# Supplementary material for: Electronic, optical and charge transport properties of Zn–porphyrin–C60 MOFs: a combined periodic and cluster modeling
Source: Royal Society of Chemistry journal article supplement (doi:10.1039/d4dt01459f), 2024-01-01
Supplement: d4dt01459f1.pdf [file d4dt01459f1.pdf]

## Supplementary Information

### Electronic, optical and transport properties of Zn-Porphyrin-C<sub>60</sub> MOFs: A combined periodic and cluster modeling.

Kevin Granados-Tavera<sup>a,b</sup>, Gloria Cárdenas-Jirón<sup>\*a</sup>

<sup>a</sup>Laboratory of Theoretical Chemistry, Faculty of Chemistry and Biology, University of Santiago de Chile (USACH), Santiago, Chile

<sup>b</sup>Facultad de Ciencias Básicas, Universidad de la Amazonia, Florencia, Colombia

\*Corresponding author: gloria.cardenas@usach.cl

#### Table of Contents

|                                                                                                                                                                                                                                                                                                                                                                                                                                                                            |    |
|----------------------------------------------------------------------------------------------------------------------------------------------------------------------------------------------------------------------------------------------------------------------------------------------------------------------------------------------------------------------------------------------------------------------------------------------------------------------------|----|
| <b>Figure S1.</b> Optimized unit cells for the MOFs with and without C <sub>60</sub> , except <b>R<sub>py</sub></b> and <b>C<sub>60</sub>@R<sub>py</sub></b> , calculated with density functional theory (PBEsol/DZP/Pseudodojo). Color code: H (white), C (gray), N(blue), O (red), S (green) and Zn (purple).....                                                                                                                                                        | 3  |
| <b>Figure S2.</b> Optimized electronic device structure for a cluster; <b>R<sub>sulf</sub></b> and <b>C<sub>60</sub>@R<sub>sulf</sub></b> . Front view (top) and side view (bottom).....                                                                                                                                                                                                                                                                                   | 4  |
| <b>Table S1.</b> Lattice parameters of the MOFs with and without C <sub>60</sub> .....                                                                                                                                                                                                                                                                                                                                                                                     | 4  |
| <b>Figure S3.</b> Density of states of <b>C<sub>60</sub>@R<sub>pyr</sub></b> , <b>C<sub>60</sub>@R<sub>phen</sub></b> and <b>C<sub>60</sub>@R<sub>oxy,biph</sub></b> (oxygen-functionalized materials) MOFs calculated using the PBE-D3 level. Fermi level energy is indicated by $\epsilon_F$ . ....                                                                                                                                                                      | 5  |
| <b>Figure S4.</b> Density of states of <b>C<sub>60</sub>@R<sub>thiopyr</sub></b> , <b>C<sub>60</sub>@R<sub>sulf</sub></b> and <b>C<sub>60</sub>@R<sub>sulf,biph</sub></b> (sulfur-functionalized materials) MOFs calculated using the PBE-D3 level. Fermi level energy is indicated by $\epsilon_F$ . ....                                                                                                                                                                 | 6  |
| <b>Figure S5.</b> Band structure of the MOFs with and without C <sub>60</sub> calculated using the PBE-D3 level. Fermi level and band gap energy is indicated by $\epsilon_F$ and $E_g$ respectively. The space group of the MOFs is P1. The calculations were performed along the X $\Gamma$ YALCBZ path of the Brillouin zone. The x-coordinates of the high-symmetry points along this path are 0.00, 0.19, 0.32, 0.40, 0.58, 0.66, 0.81, and 0.99 Å, respectively..... | 9  |
| <b>Figure S6.</b> Electronic absorption spectra of MOFs clusters calculated at the TPSSh/6–31G level of theory. <sup>a</sup> MOF cluster without C <sub>60</sub> . <sup>b</sup> Porphyrin unit.....                                                                                                                                                                                                                                                                        | 10 |
| <b>Table S2.</b> Excited states, excitation wavelength ( $\lambda$ ), oscillator strengths ( $f$ ) for model C <sub>60</sub> @MOFs clusters obtained from TD-DFT calculations (TPSSh/6-31G).....                                                                                                                                                                                                                                                                           | 11 |
| <b>Table S3.</b> Excited states, excitation wavelength ( $\lambda$ ), oscillator strengths ( $f$ ) for model MOFs without C <sub>60</sub> clusters obtained from TD-DFT calculations (TPSSh/6-31G).....                                                                                                                                                                                                                                                                    | 18 |
| <b>Table S4.</b> Excited states, excitation wavelength ( $\lambda$ ), oscillator strengths ( $f$ ) for porphyrin unit of MOFs obtained from TD-DFT calculations (TPSSh/6-31G).....                                                                                                                                                                                                                                                                                         | 22 |
| <b>Figure S7.</b> Molecular structure of <b>C<sub>60</sub>@R<sub>py-new</sub></b> . Color code: H (white), C (gray), N(blue), O (red), and Zn (purple).....                                                                                                                                                                                                                                                                                                                | 25 |

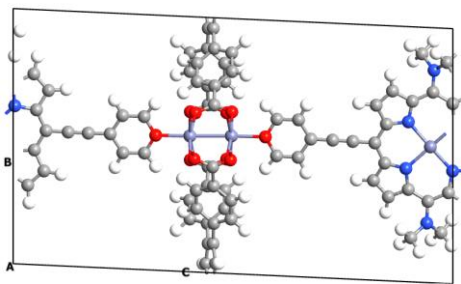

**R<sub>pyr</sub>**

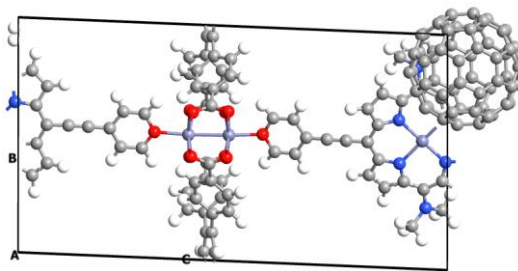

**C<sub>60</sub>@R<sub>pyr</sub>**

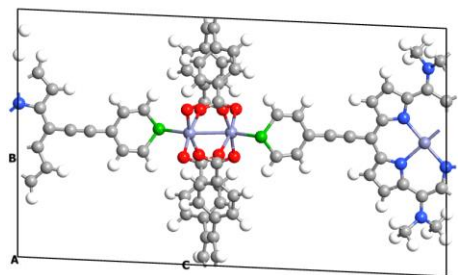

**R<sub>thiopyr</sub>**

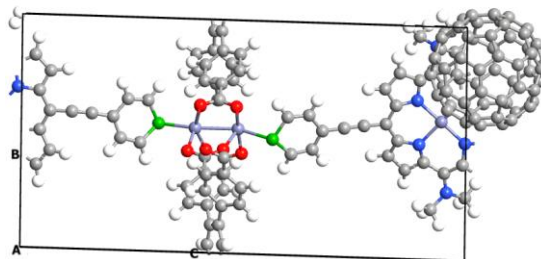

**C<sub>60</sub>@R<sub>thiopyr</sub>**

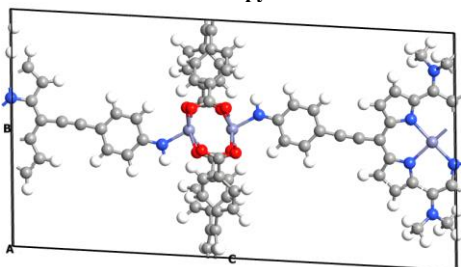

**R<sub>amine</sub>**

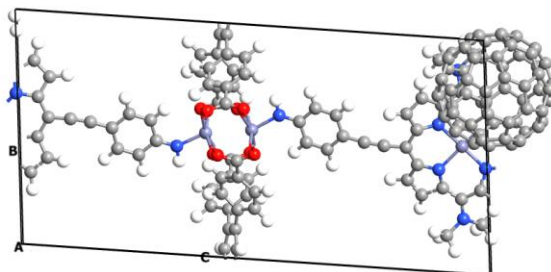

**C<sub>60</sub>@R<sub>amine</sub>**

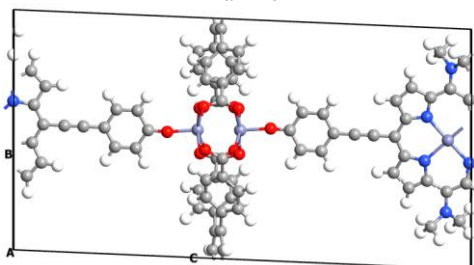

**R<sub>phen</sub>**

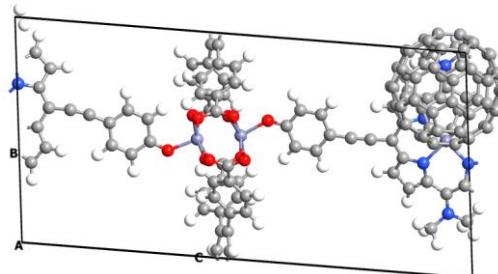

**C<sub>60</sub>@R<sub>phen</sub>**

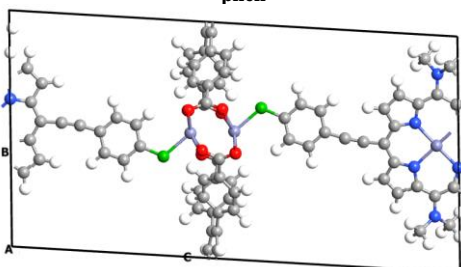

**R<sub>sulf</sub>**

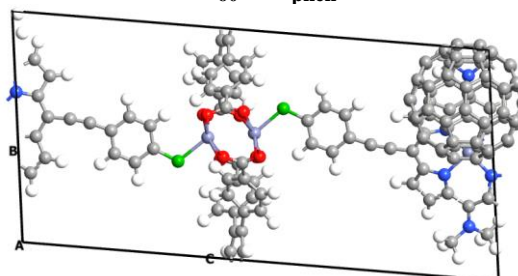

**C<sub>60</sub>@R<sub>sulf</sub>**

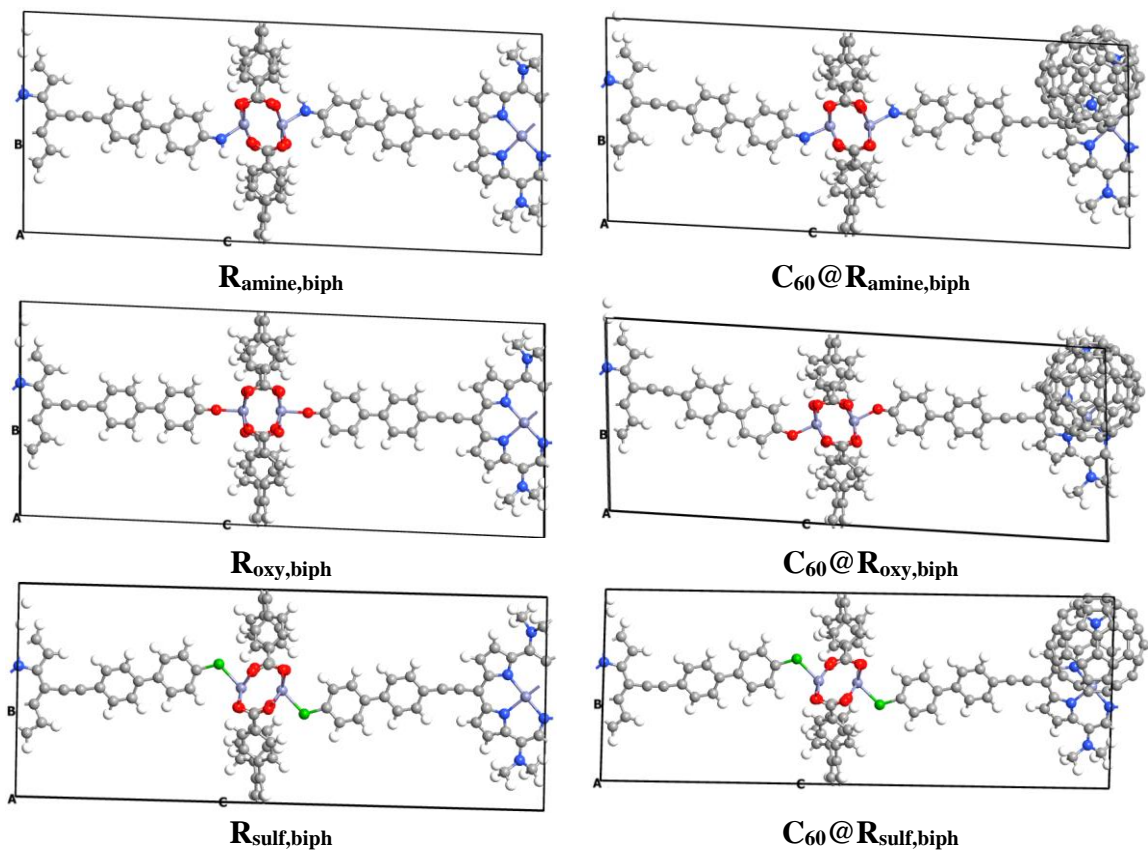

**Figure S1.** Optimized unit cells for the MOFs with and without C<sub>60</sub>, except **R<sub>py</sub>** and **C<sub>60</sub>@R<sub>py</sub>**, calculated with density functional theory (PBEsol/DZP/Pseudodojo). Color code: H (white), C (gray), N (blue), O (red), S (green) and Zn (purple).

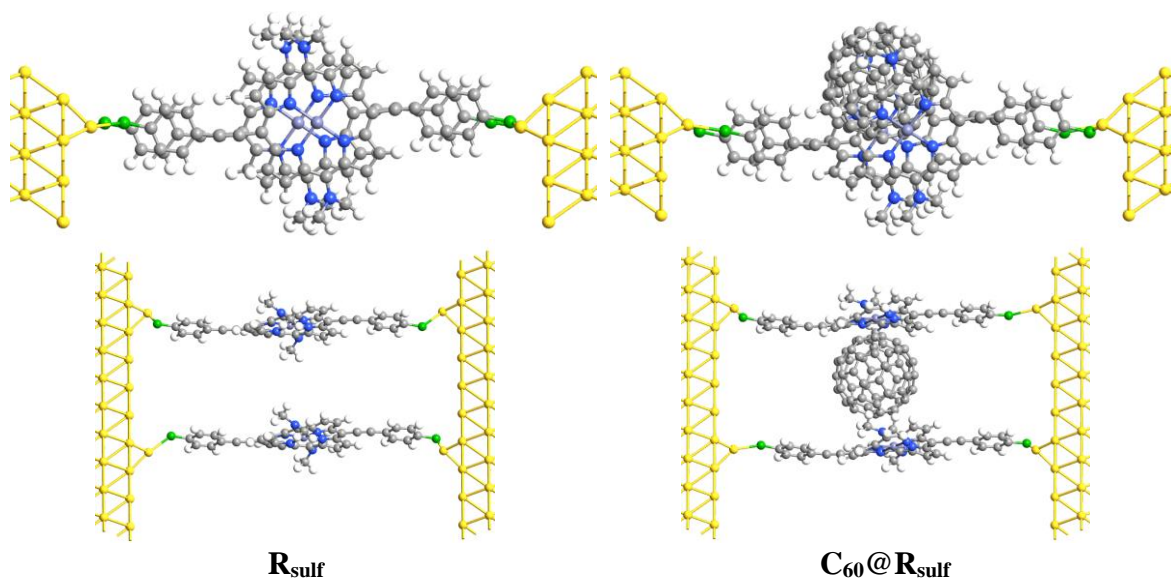

**Figure S2.** Optimized electronic device structure for a cluster;  $\mathbf{R}_{\text{sulf}}$  and  $\mathbf{C}_{60}@\mathbf{R}_{\text{sulf}}$ . Front view (top) and side view (bottom).

**Table S1.** Lattice parameters of the MOFs with and without  $\mathbf{C}_{60}$ .

| MOF                                              | a(Å)  | b(Å)  | c(Å)  | $\alpha(^{\circ})$ | $\beta(^{\circ})$ | $\gamma(^{\circ})$ |
|--------------------------------------------------|-------|-------|-------|--------------------|-------------------|--------------------|
| $\mathbf{R}_{\text{py}}$                         | 11.66 | 15.68 | 27.35 | 92.39              | 95.49             | 90.13              |
| $\mathbf{R}_{\text{pyr}}$                        | 11.55 | 15.74 | 27.39 | 92.60              | 95.19             | 90.06              |
| $\mathbf{R}_{\text{thiopyr}}$                    | 11.51 | 15.60 | 27.89 | 92.51              | 94.74             | 90.20              |
| $\mathbf{R}_{\text{amine}}$                      | 11.70 | 15.59 | 29.33 | 93.66              | 96.08             | 89.62              |
| $\mathbf{R}_{\text{phen}}$                       | 11.64 | 15.59 | 29.91 | 92.40              | 95.65             | 90.11              |
| $\mathbf{R}_{\text{sulf}}$                       | 11.68 | 15.51 | 29.56 | 94.10              | 96.51             | 89.56              |
| $\mathbf{R}_{\text{amine,biph}}$                 | 11.66 | 15.68 | 37.28 | 92.38              | 95.49             | 90.13              |
| $\mathbf{R}_{\text{oxy,biph}}$                   | 11.67 | 15.63 | 38.59 | 92.38              | 95.78             | 90.06              |
| $\mathbf{R}_{\text{sulf,biph}}$                  | 11.73 | 15.38 | 38.42 | 90.53              | 96.69             | 90.75              |
| $\mathbf{C}_{60}@\mathbf{R}_{\text{py}}$         | 12.85 | 14.67 | 27.17 | 94.67              | 93.11             | 90.54              |
| $\mathbf{C}_{60}@\mathbf{R}_{\text{pyr}}$        | 12.71 | 14.84 | 27.34 | 92.26              | 95.45             | 90.81              |
| $\mathbf{C}_{60}@\mathbf{R}_{\text{thiopyr}}$    | 12.71 | 14.56 | 27.74 | 91.04              | 92.36             | 90.29              |
| $\mathbf{C}_{60}@\mathbf{R}_{\text{amine}}$      | 12.93 | 14.46 | 29.03 | 95.36              | 94.82             | 89.67              |
| $\mathbf{C}_{60}@\mathbf{R}_{\text{phen}}$       | 13.04 | 14.31 | 28.81 | 96.25              | 94.55             | 89.65              |
| $\mathbf{C}_{60}@\mathbf{R}_{\text{sulf}}$       | 13.17 | 14.20 | 29.55 | 97.21              | 96.49             | 89.31              |
| $\mathbf{C}_{60}@\mathbf{R}_{\text{amine,biph}}$ | 13.03 | 14.45 | 37.75 | 93.51              | 97.79             | 89.30              |
| $\mathbf{C}_{60}@\mathbf{R}_{\text{oxy,biph}}$   | 12.94 | 14.37 | 37.43 | 94.67              | 96.93             | 89.25              |
| $\mathbf{C}_{60}@\mathbf{R}_{\text{sulf,biph}}$  | 13.04 | 14.30 | 38.27 | 89.29              | 96.19             | 90.60              |

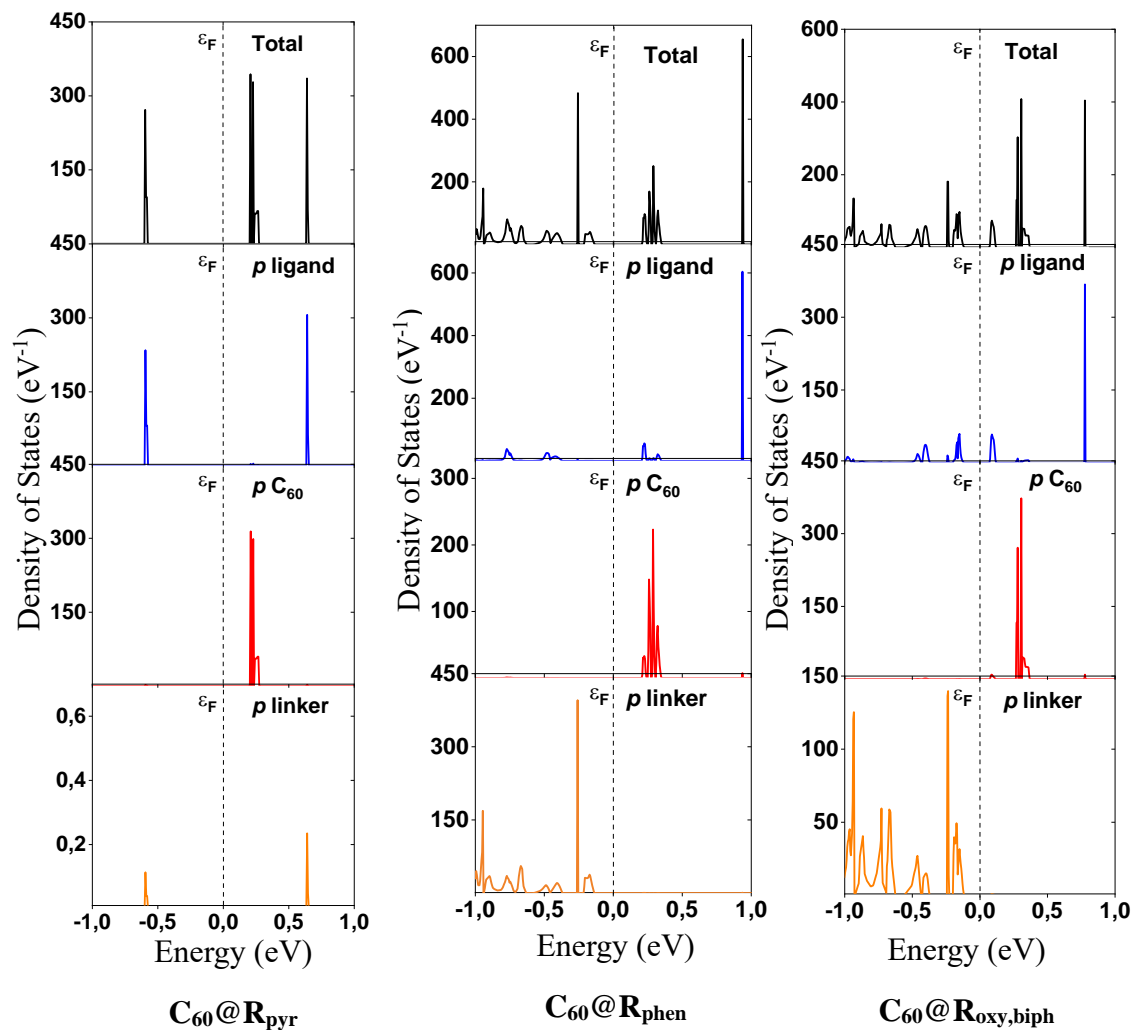

**Figure S3.** Density of states of  $C_{60}@R_{pyr}$ ,  $C_{60}@R_{phen}$  and  $C_{60}@R_{oxy,biph}$  (oxygen-functionalized materials) MOFs calculated using the PBE-D3 level. Fermi level energy is indicated by  $\epsilon_F$ .

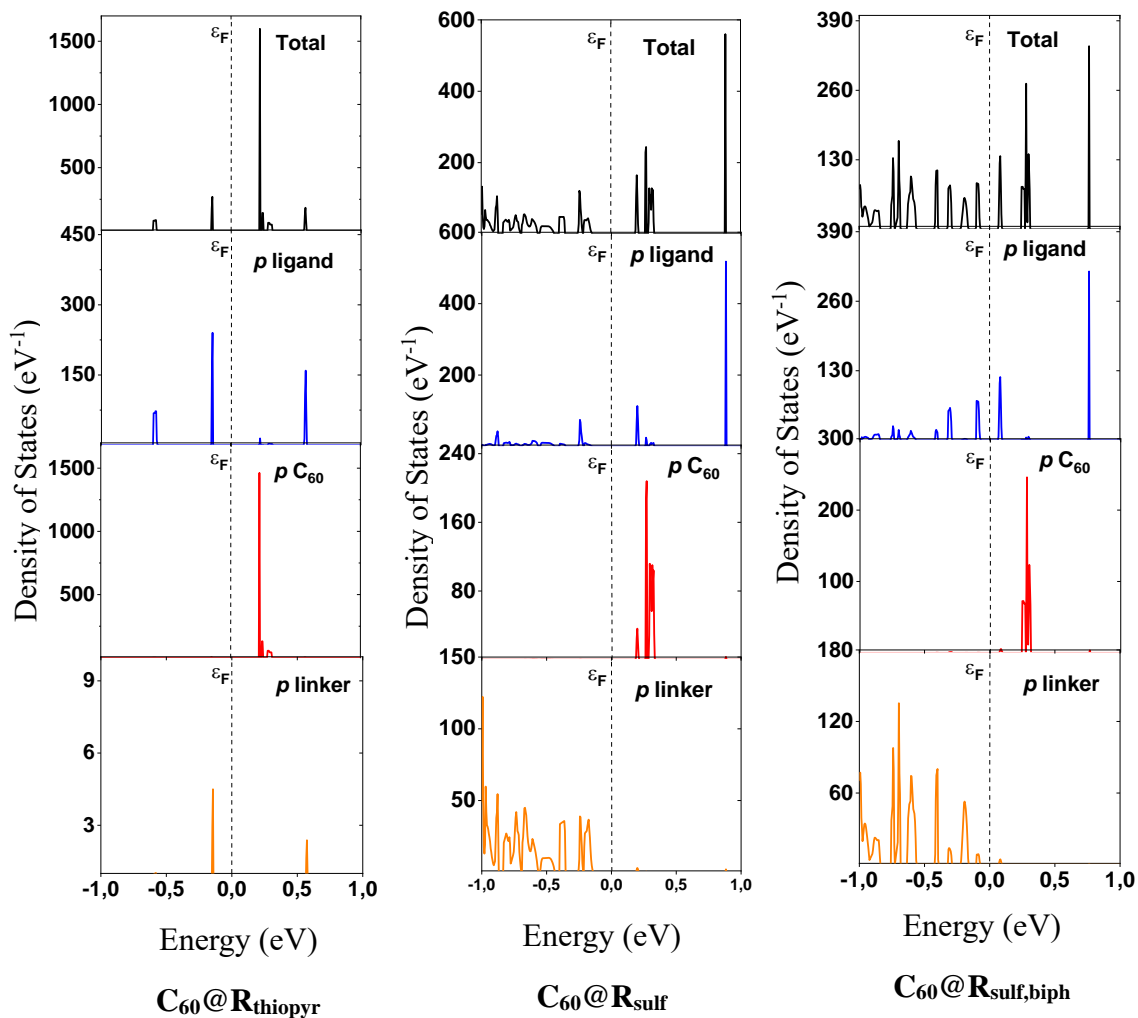

**Figure S4.** Density of states of  $C_{60}@R_{thiopyr}$ ,  $C_{60}@R_{sulf}$  and  $C_{60}@R_{sulf,biph}$  (sulfur-functionalized materials) MOFs calculated using the PBE-D3 level. Fermi level energy is indicated by  $\epsilon_F$ .

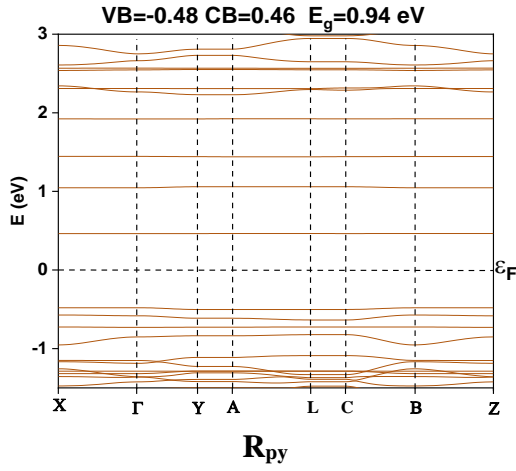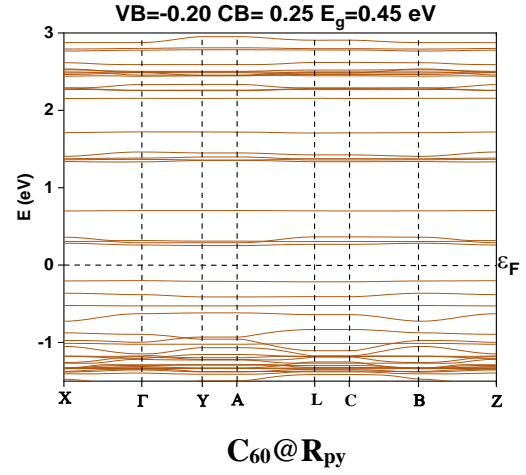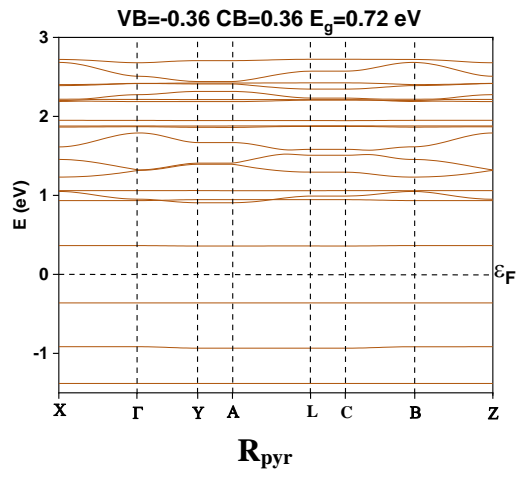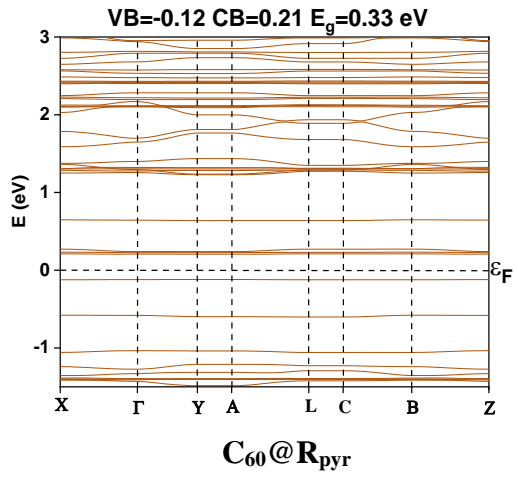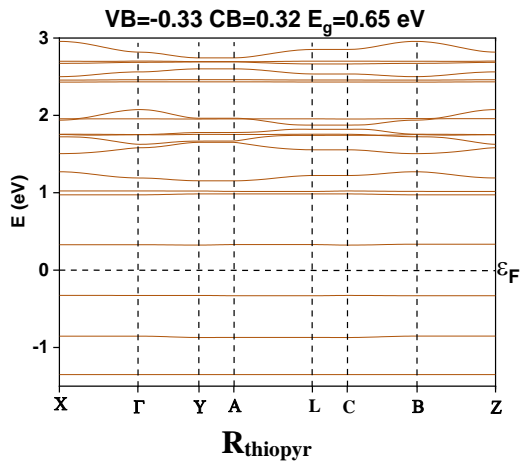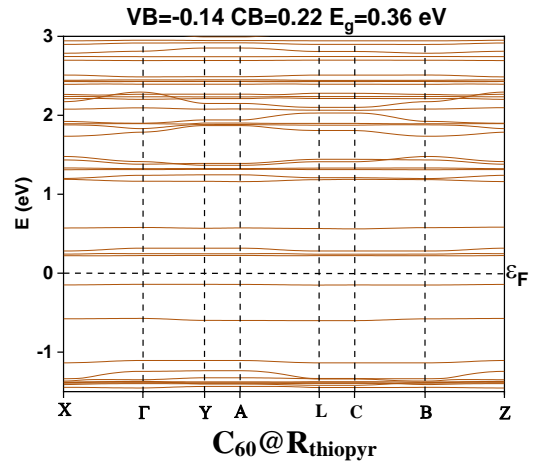

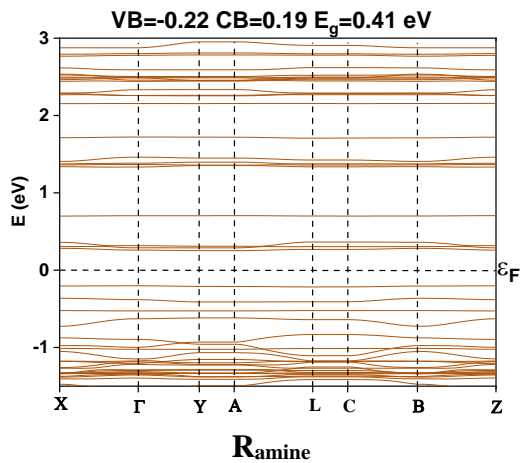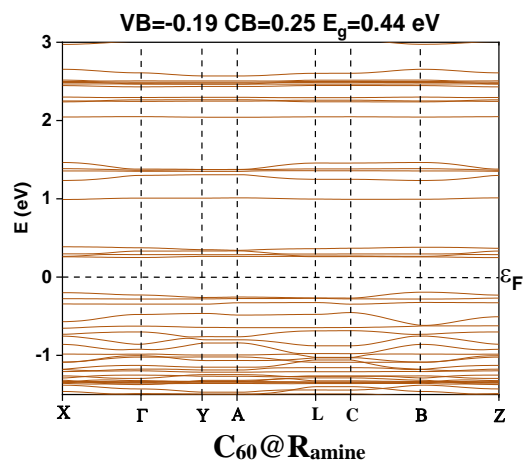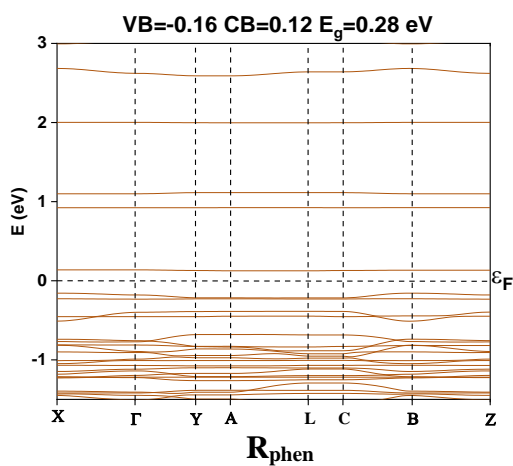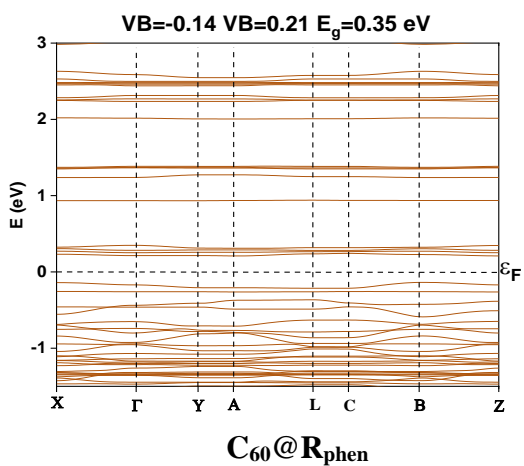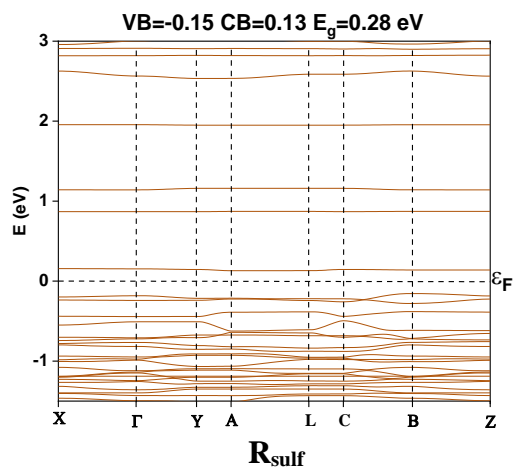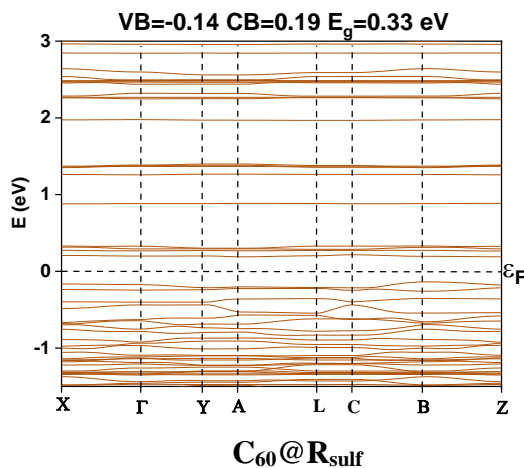



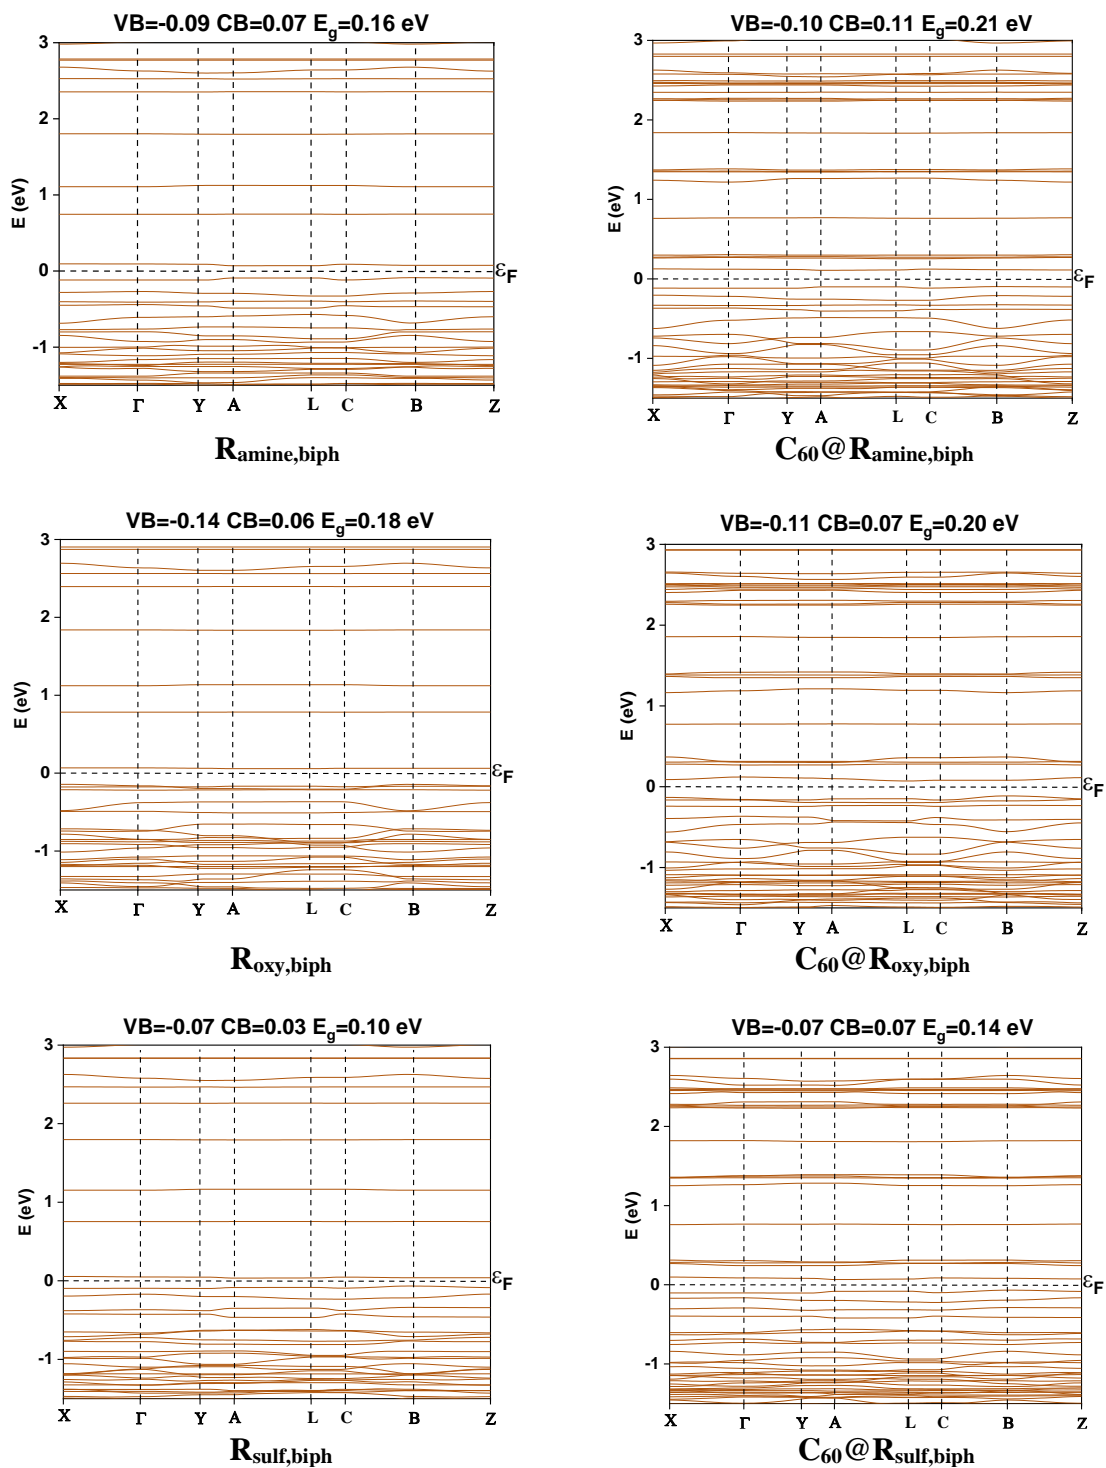

**Figure S5.** Band structure of the MOFs with and without  $C_{60}$  calculated using the PBE-D3 level. Fermi level and band gap energy is indicated by  $\epsilon_F$  and  $E_g$  respectively. The space group of the MOFs is P1. The calculations were performed along the X $\Gamma$ YALCBZ path of the Brillouin zone. The x-coordinates of the high-symmetry points along this path are 0.00, 0.19, 0.32, 0.40, 0.58, 0.66, 0.81, and 0.99 Å, respectively.

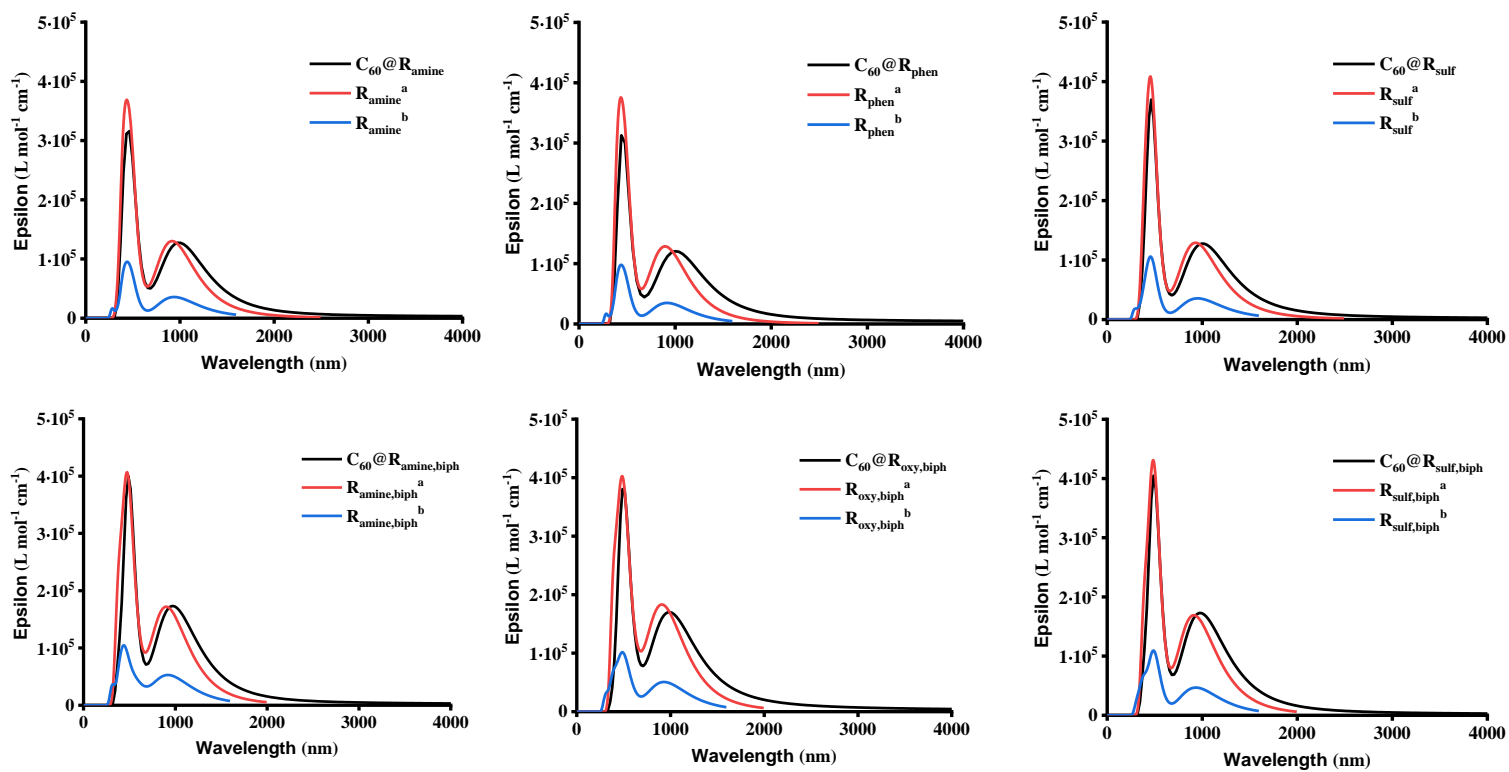

**Figure S6.** Electronic absorption spectra of MOFs clusters calculated at the TPSSh/6–31G level of theory. <sup>a</sup> MOF cluster without C<sub>60</sub>. <sup>b</sup> Porphyrin unit.

**Table S2.** Excited states, excitation wavelength ( $\lambda$ ), oscillator strengths ( $f$ ) for model  $C_{60}$ @MOFs clusters obtained from TD-DFT calculations (TPSSH/6-31G).

| MOF              | Excited State | $\lambda$ (nm) | $f$    | Transition Involved                                                                  |                                                                                       |
|------------------|---------------|----------------|--------|--------------------------------------------------------------------------------------|---------------------------------------------------------------------------------------|
| $C_{60}@R_{py}$  | 1             | 2139           | 0.0001 | 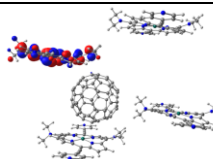   |    |
|                  |               |                |        | NTOocc                                                                               | → NTOvirt                                                                             |
|                  | 2             | 2064           | 0.0082 |    |    |
|                  |               |                |        | NTOocc                                                                               | → NTOvirt                                                                             |
|                  | 6             | 1952           | 0.0284 |    |    |
|                  |               |                |        | NTOocc                                                                               | → NTOvirt                                                                             |
| $C_{60}@R_{pyr}$ | 8             | 1910           | 0.0378 |  |  |
|                  |               |                |        | NTOocc                                                                               | → NTOvirt                                                                             |
|                  | 28            | 889            | 2.6075 |  |  |
|                  |               |                |        | NTOocc                                                                               | → NTOvirt                                                                             |
|                  | 346           | 413            | 2.2285 |  |  |
|                  |               |                |        | NTOocc                                                                               | → NTOvirt                                                                             |
| $C_{60}@R_{pyr}$ | 1             | 7161           | 0.0015 |  |  |
|                  |               |                |        | NTOocc                                                                               | → NTOvirt                                                                             |

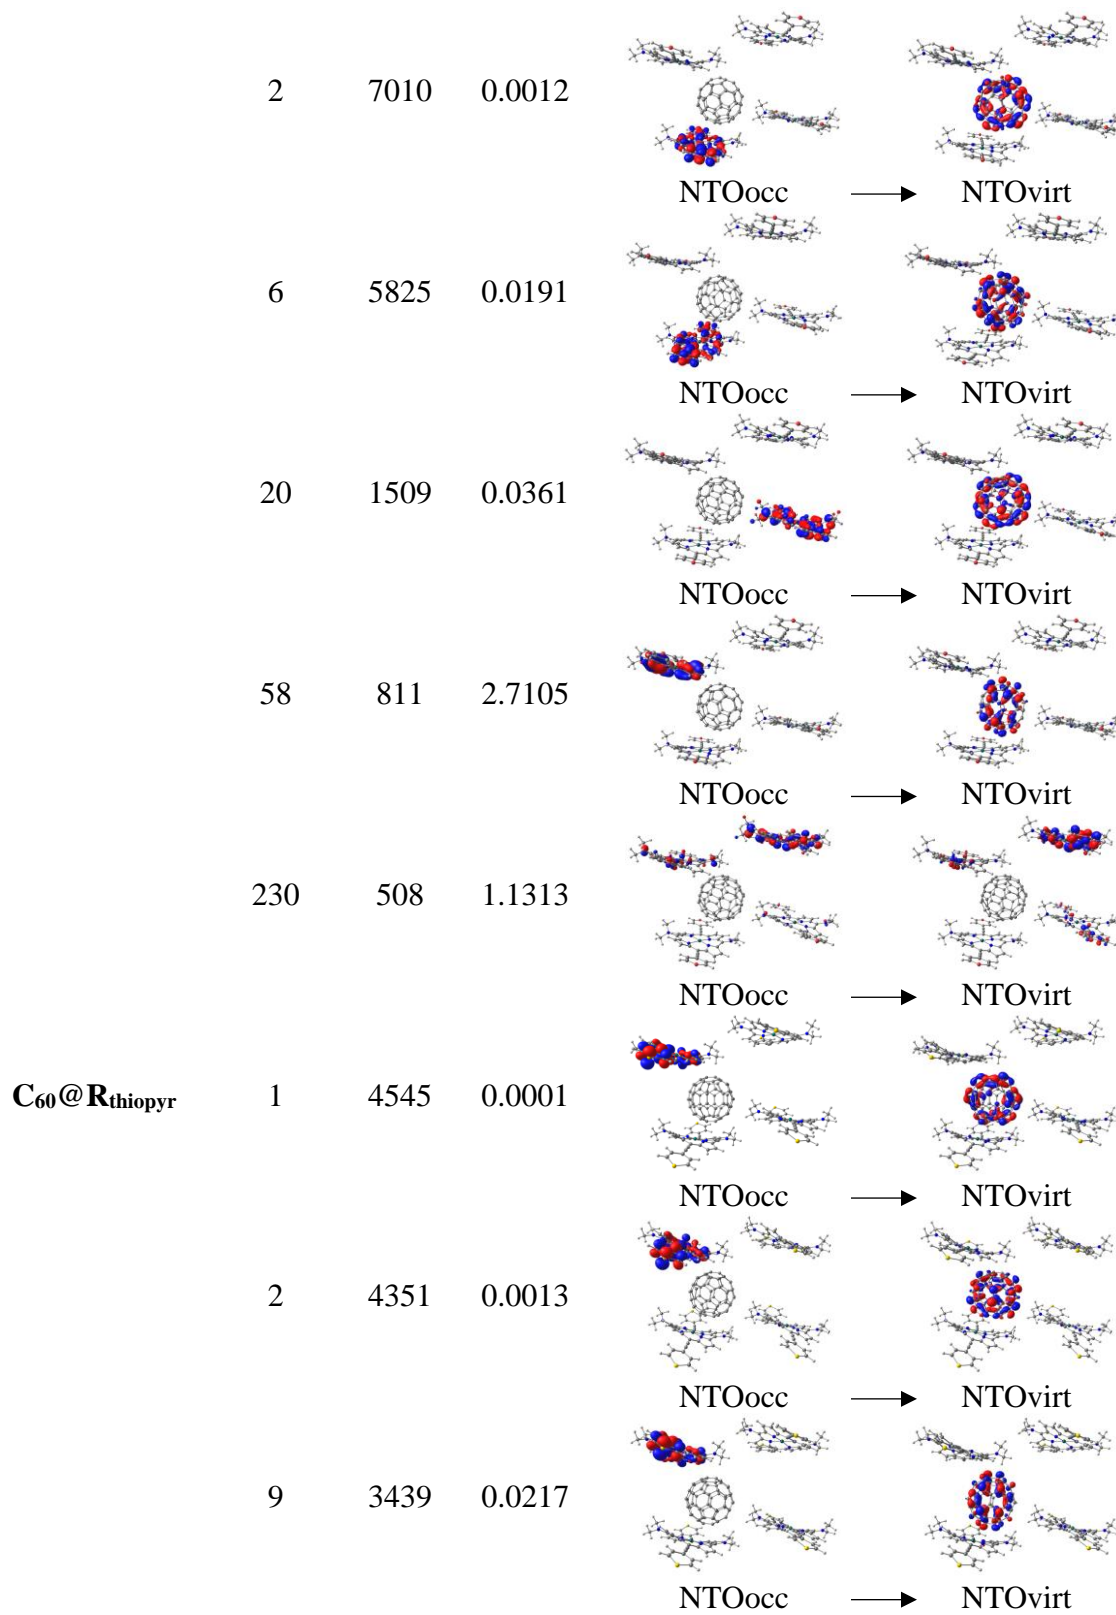

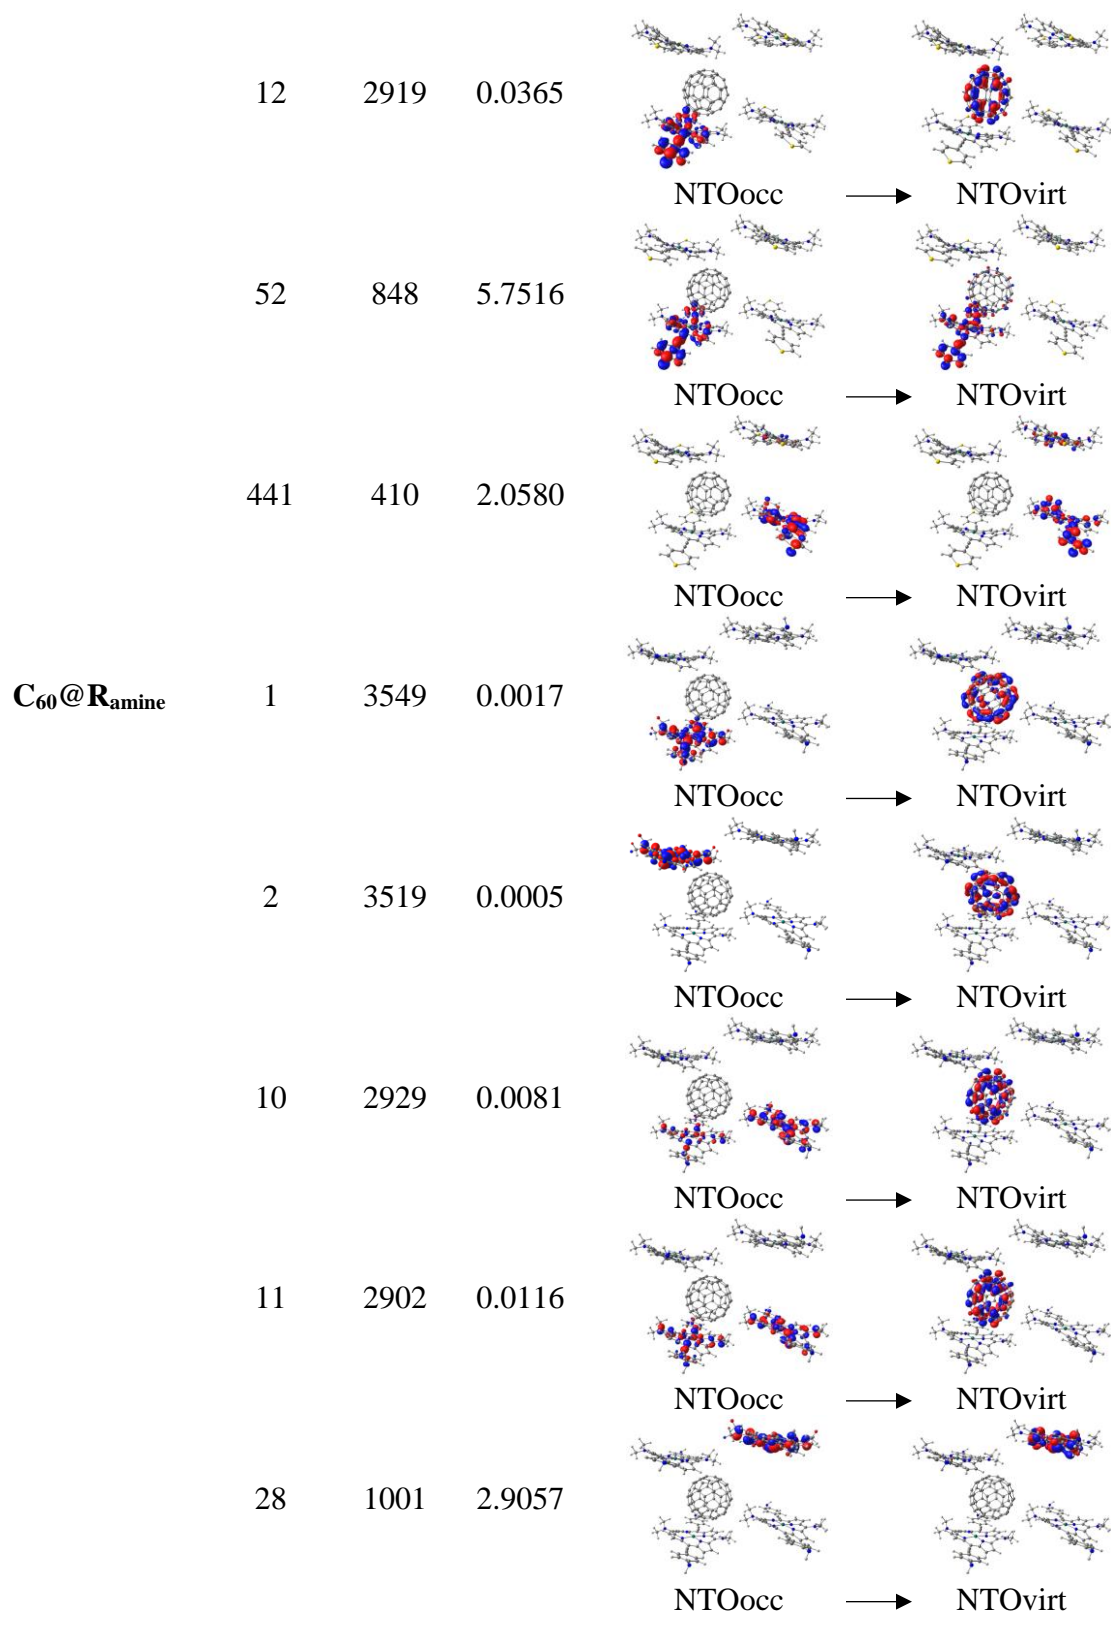

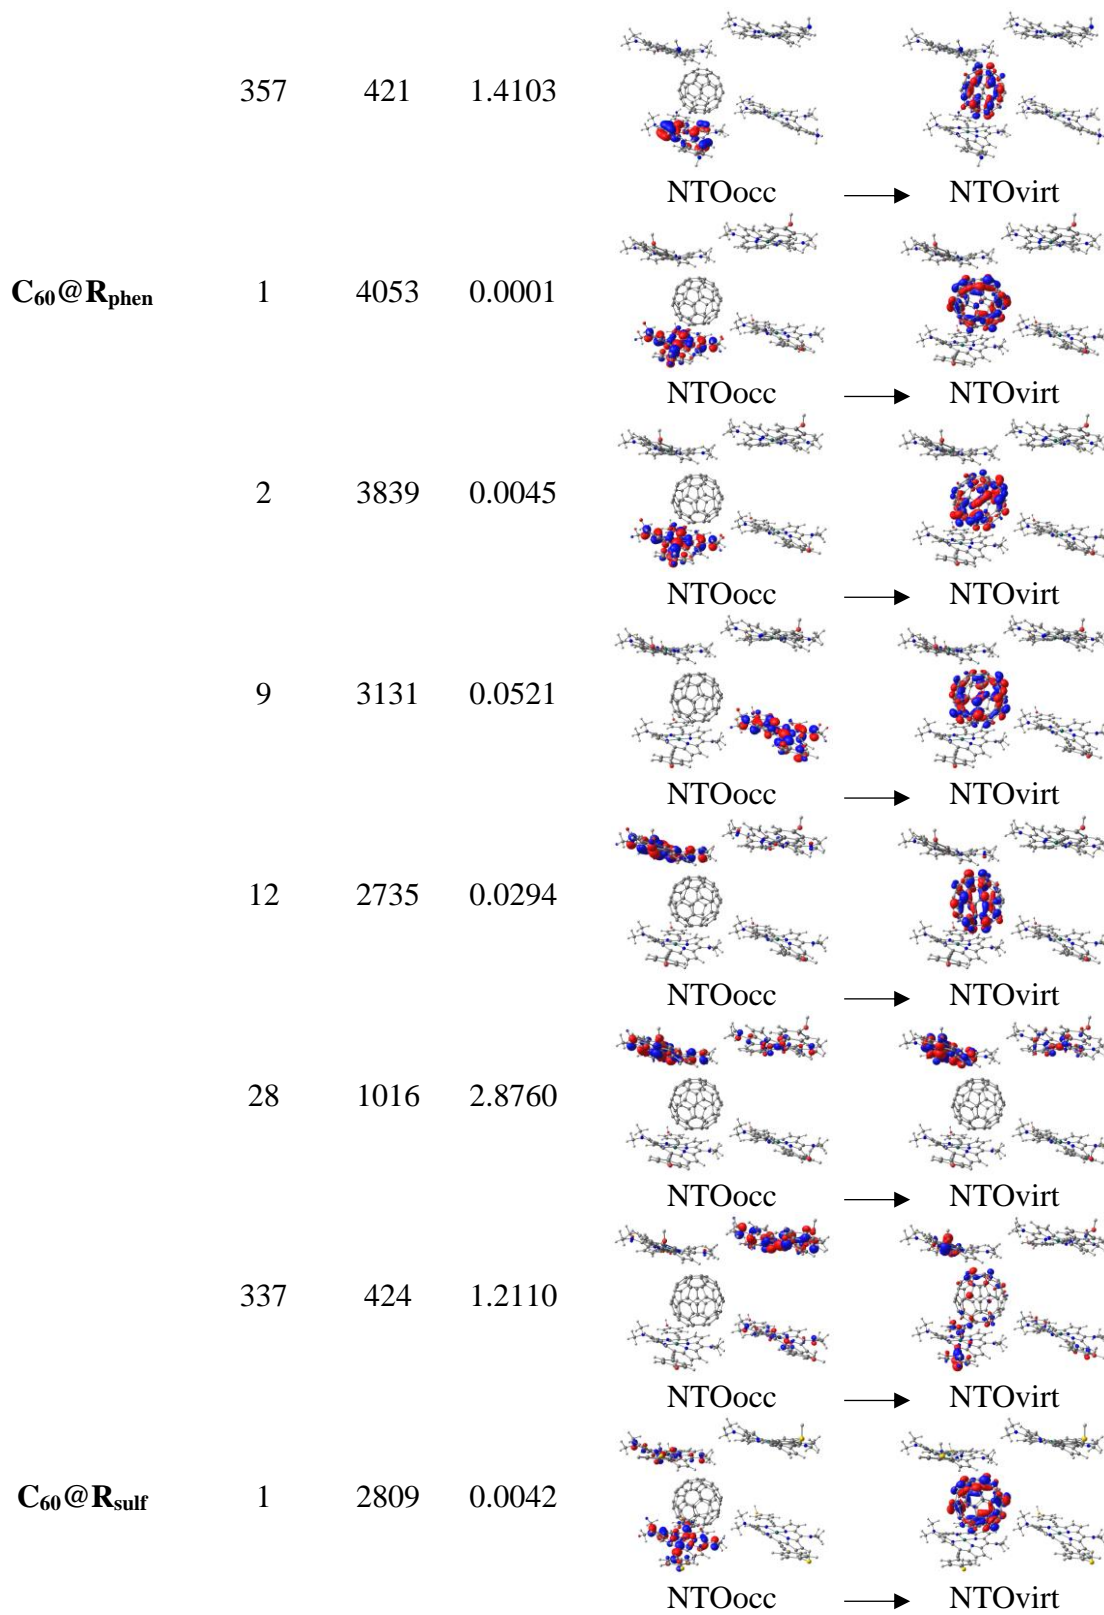

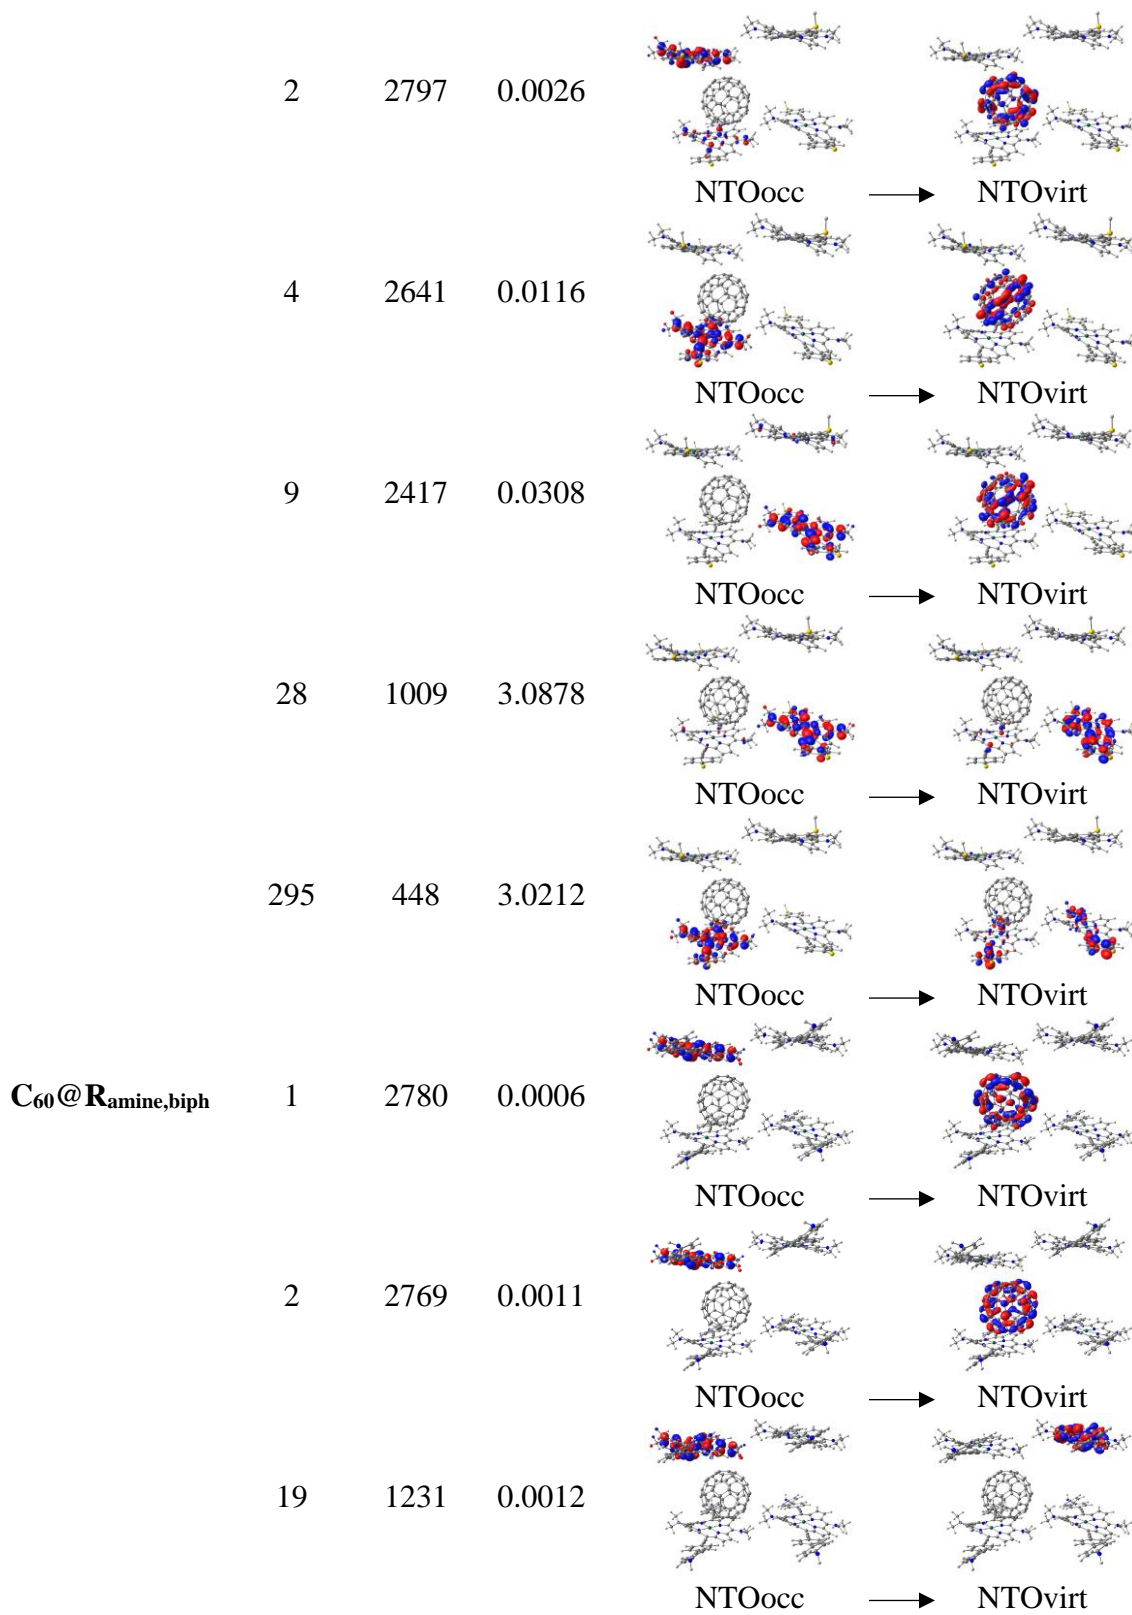



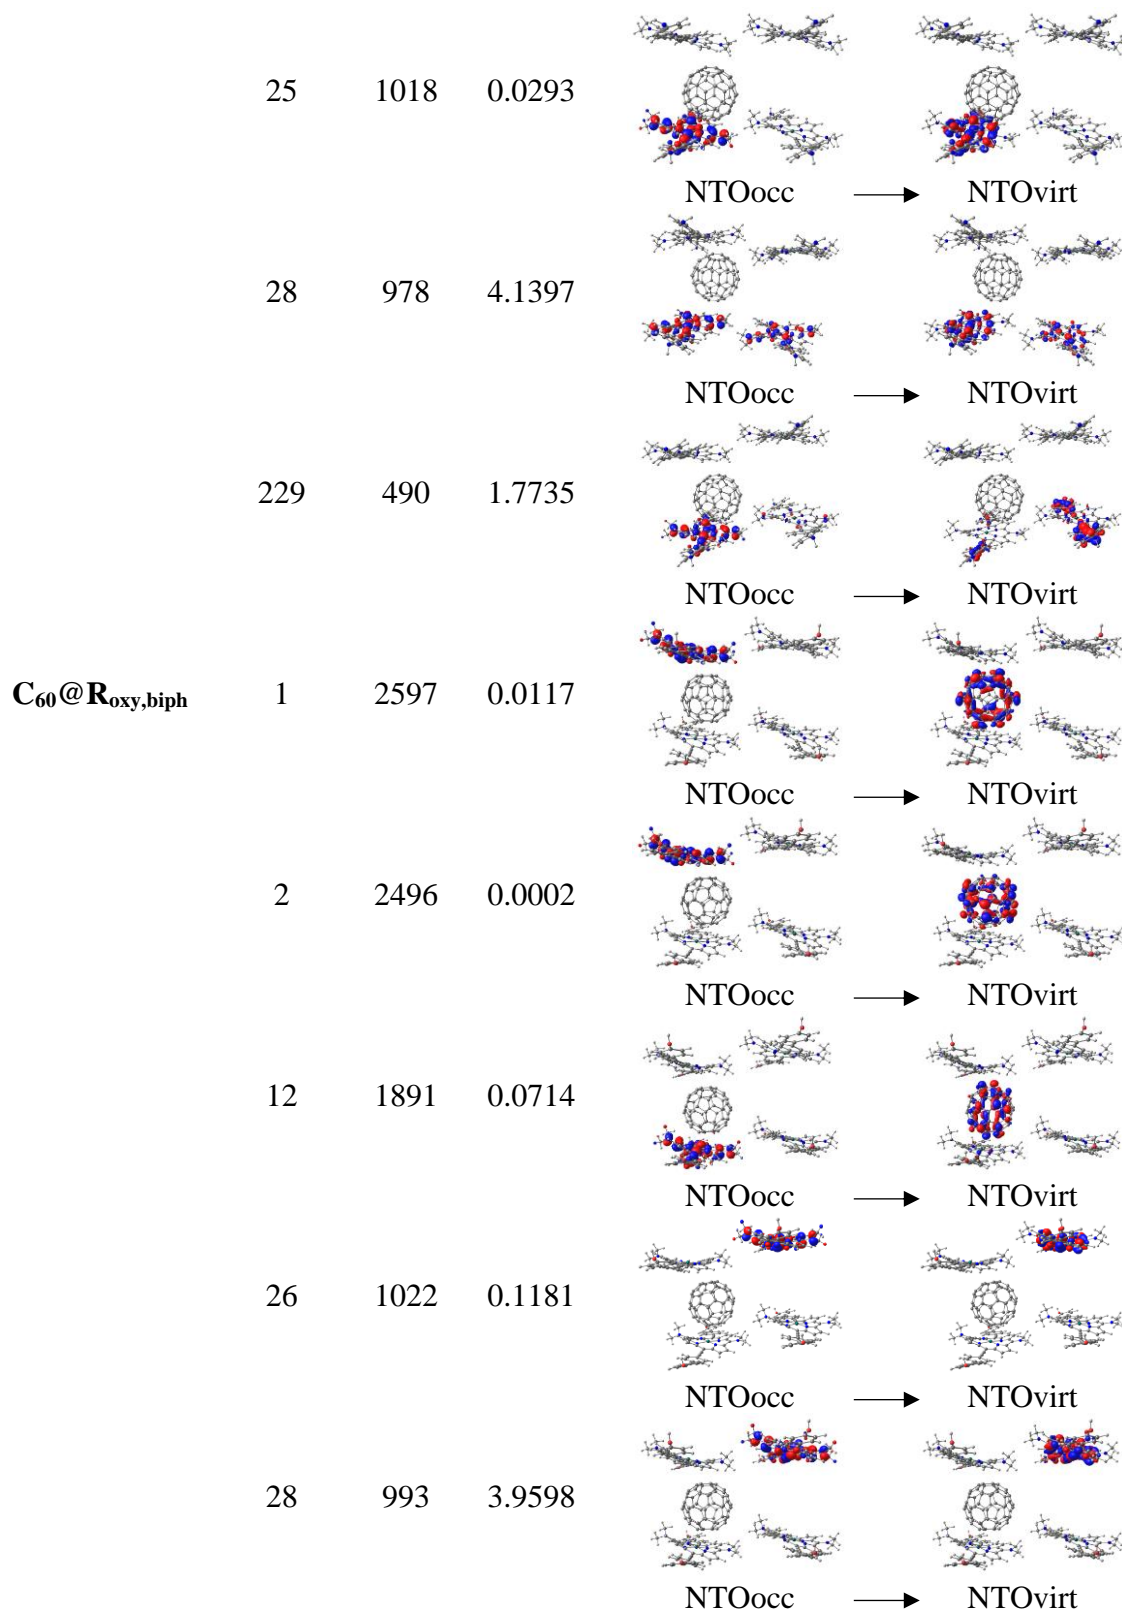



|                                             |     |      |        |                                                                                                |   |                                                                                                  |
|---------------------------------------------|-----|------|--------|------------------------------------------------------------------------------------------------|---|--------------------------------------------------------------------------------------------------|
| <b>C<sub>60</sub>@R<sub>sulf,biph</sub></b> | 225 | 493  | 1.2715 | 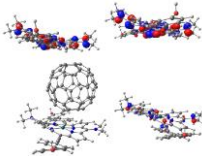<br>NTOocc   | → | <br>NTOvirt   |
|                                             | 1   | 2706 | 0.0005 | <br>NTOocc   | → | <br>NTOvirt   |
|                                             | 2   | 2674 | 0.0024 | <br>NTOocc   | → | <br>NTOvirt   |
|                                             | 5   | 2467 | 0.0359 | <br>NTOocc   | → | <br>NTOvirt   |
|                                             | 7   | 2383 | 0.0204 | <br>NTOocc | → | <br>NTOvirt |
|                                             | 28  | 987  | 4.1981 | <br>NTOocc | → | <br>NTOvirt |
|                                             | 212 | 494  | 2.7319 | <br>NTOocc | → | <br>NTOvirt |

**Table S3.** Excited states, excitation wavelength ( $\lambda$ ), oscillator strengths ( $f$ ) for model MOFs without  $C_{60}$  clusters obtained from TD-DFT calculations (TPSSH/6-31G).

| MOF       | Excited State | $\lambda$ (nm) | $f$    | Transition Involved                                                                  |
|-----------|---------------|----------------|--------|--------------------------------------------------------------------------------------|
| $R_{py}$  | 5             | 1009           | 0.0003 | 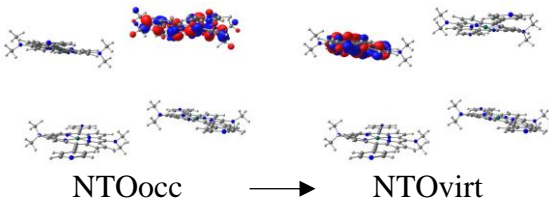   |
|           | 6             | 1008           | 0.0003 |    |
|           | 94            | 474            | 3.5877 |   |
|           | 136           | 420            | 2.6265 |  |
| $R_{pyr}$ | 15            | 819            | 0.0004 |  |
|           | 16            | 818            | 0.0029 |  |
|           | 20            | 794            | 7.7422 |  |

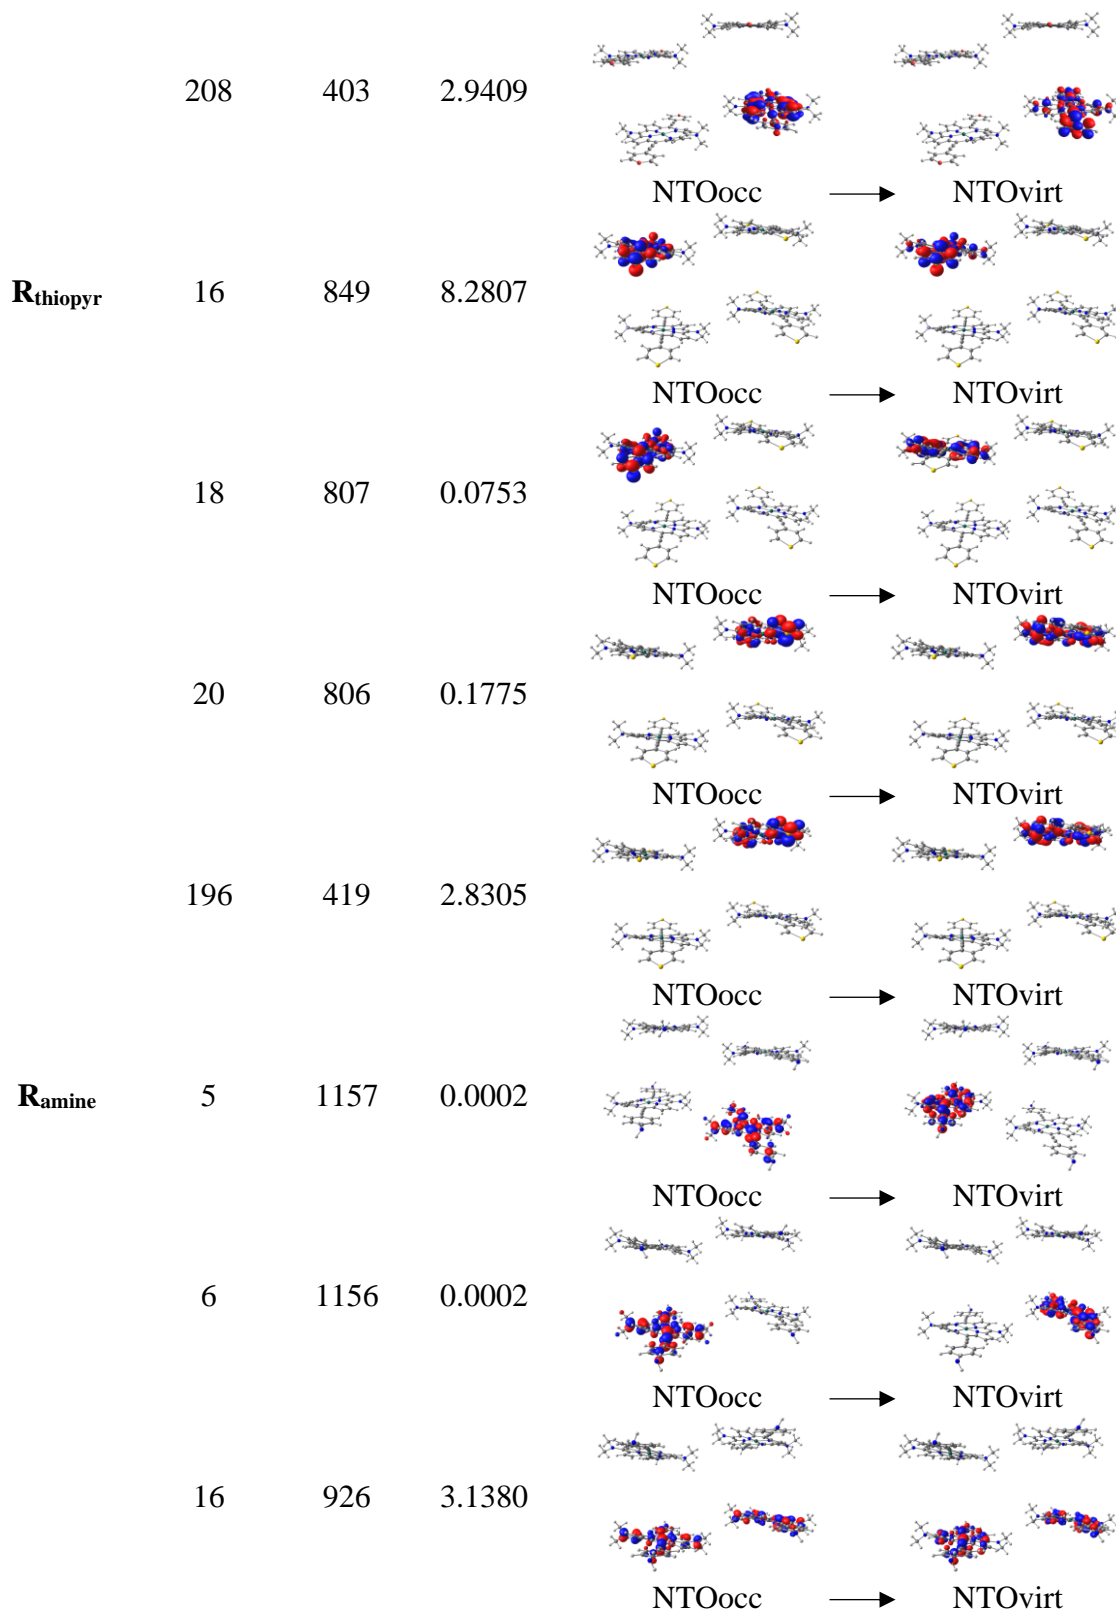

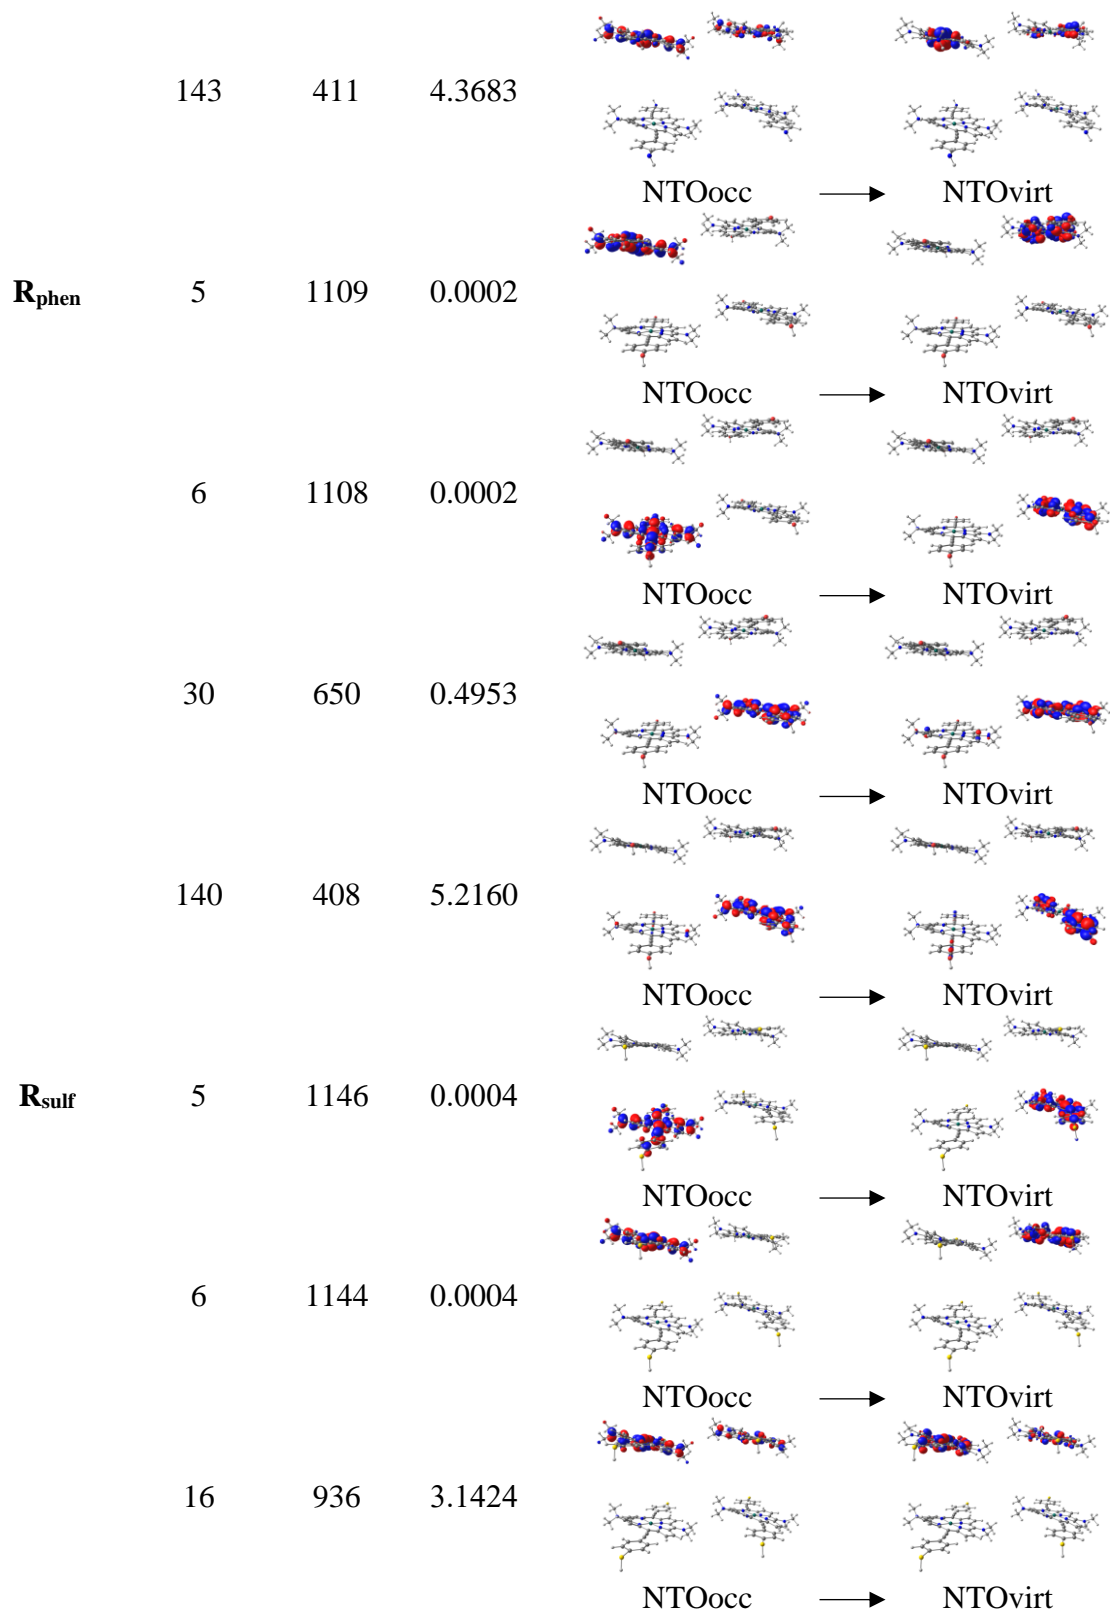

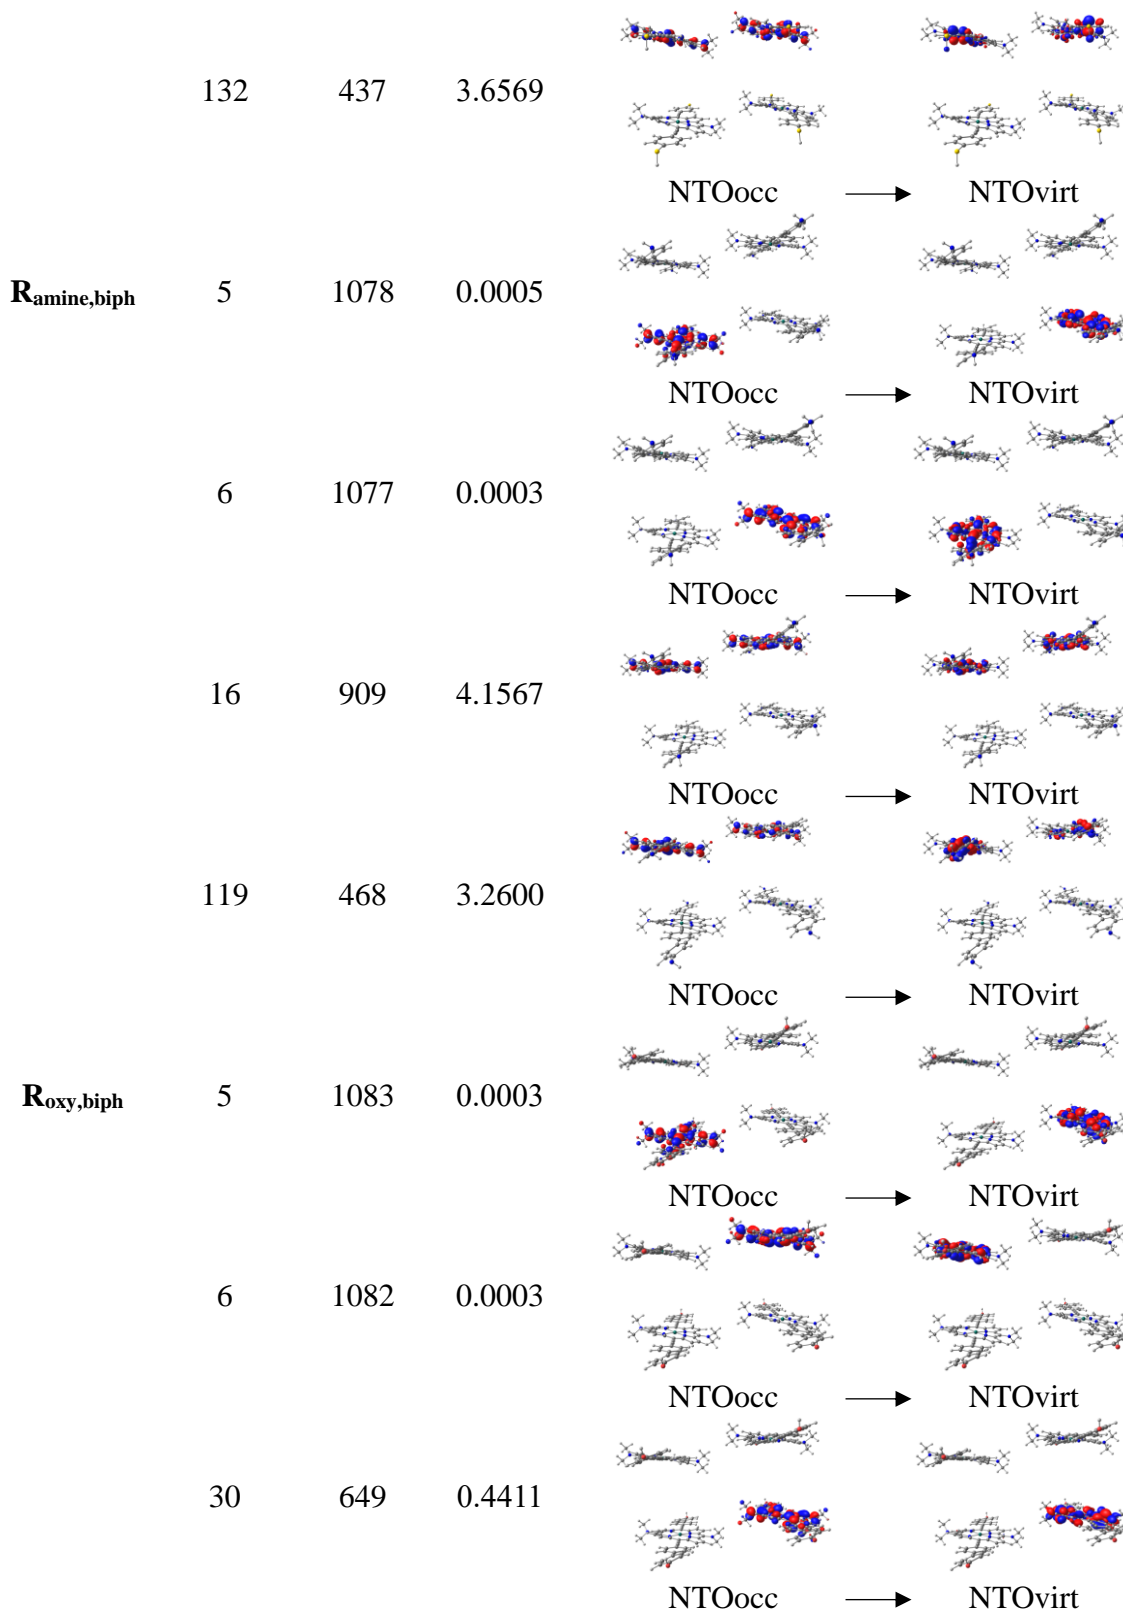

|                              |     |      |        |        |         |         |
|------------------------------|-----|------|--------|--------|---------|---------|
| <b>R<sub>sulf,biph</sub></b> | 116 | 480  | 3.3545 |        | →       |         |
|                              |     |      |        | NTOocc |         | NTOvirt |
|                              | 5   | 1082 | 0.0003 |        | →       |         |
|                              |     |      |        | NTOocc |         | NTOvirt |
|                              | 6   | 1081 | 0.0003 |        | →       |         |
|                              |     |      | NTOocc |        | NTOvirt |         |
|                              | 30  | 642  | 0.4228 |        | →       |         |
|                              |     |      |        | NTOocc |         | NTOvirt |
|                              | 105 | 498  | 3.2969 |        | →       |         |
|                              |     |      |        | NTOocc |         | NTOvirt |

**Table S4.** Excited states, excitation wavelength ( $\lambda$ ), oscillator strengths ( $f$ ) for porphyrin unit of MOFs obtained from TD-DFT calculations (TPSSH/6-31G).

| MOF                   | Excited State | $\lambda$ (nm) | $f$    | Transition Involved |   |         |
|-----------------------|---------------|----------------|--------|---------------------|---|---------|
| <b>R<sub>py</sub></b> | 1             | 889            | 0.6189 |                     | → |         |
|                       |               |                |        | NTOocc              |   | NTOvirt |
|                       | 6             | 473            | 0.9734 |                     | → |         |
|                       |               |                |        | NTOocc              |   | NTOvirt |

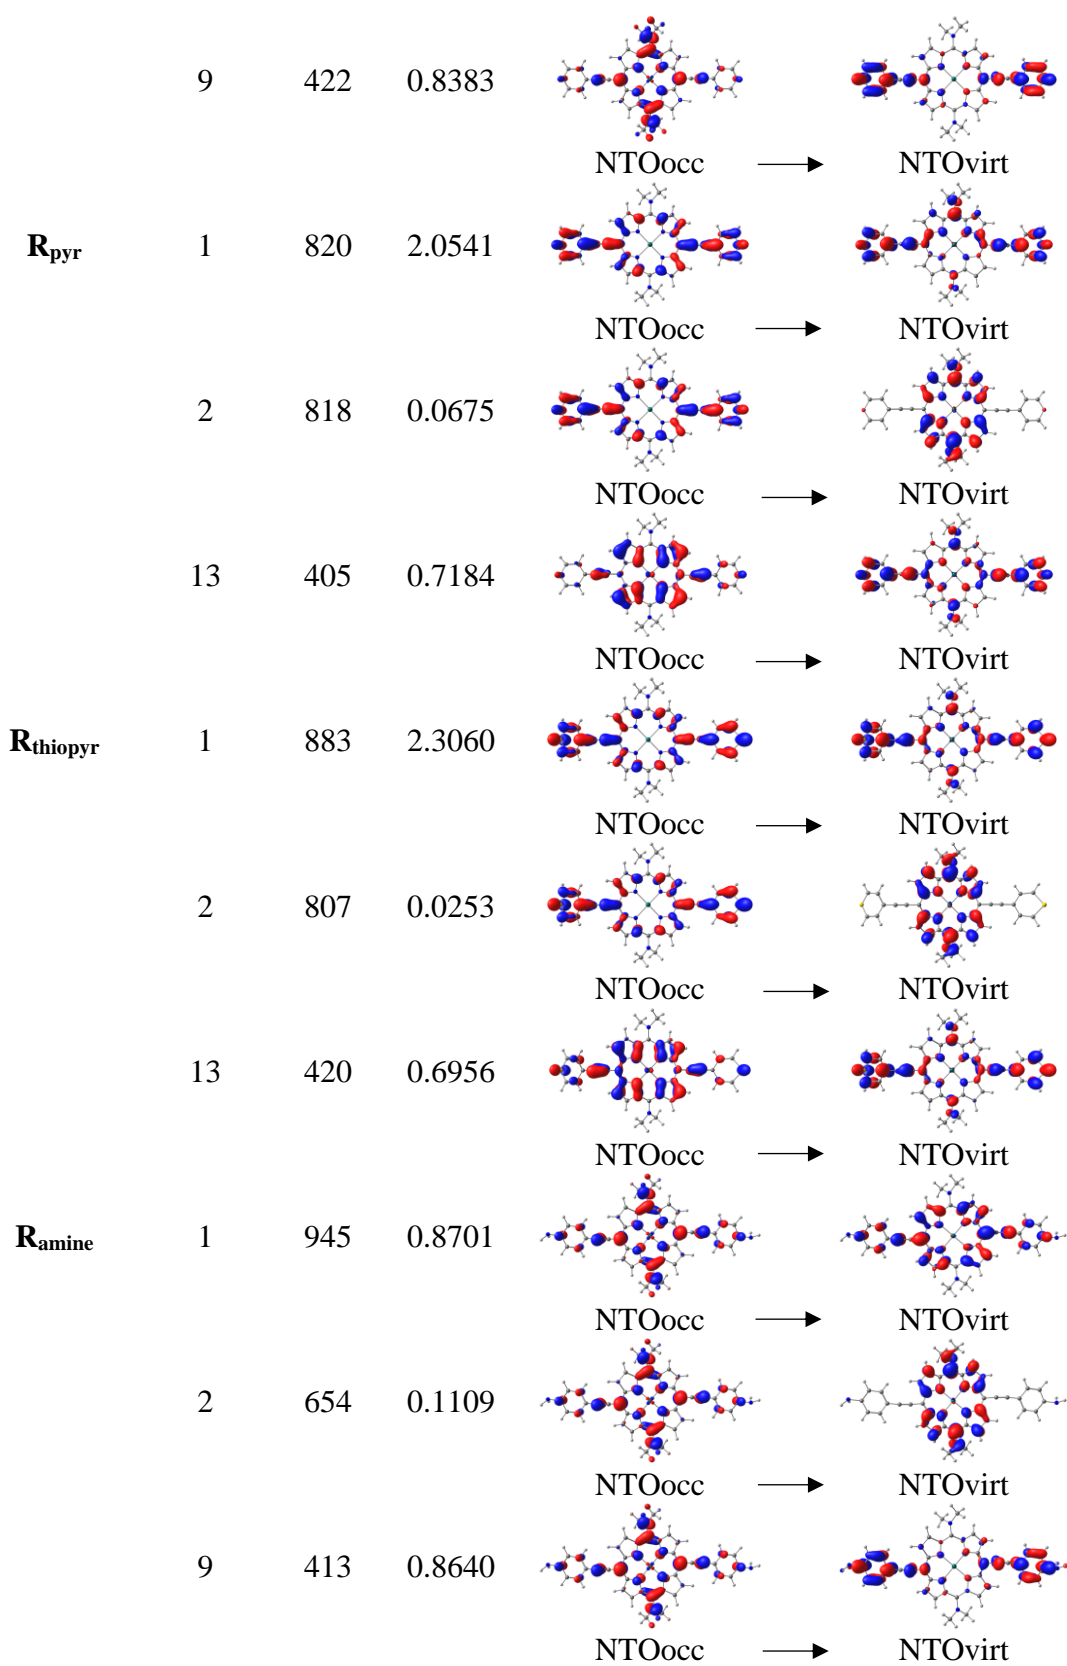

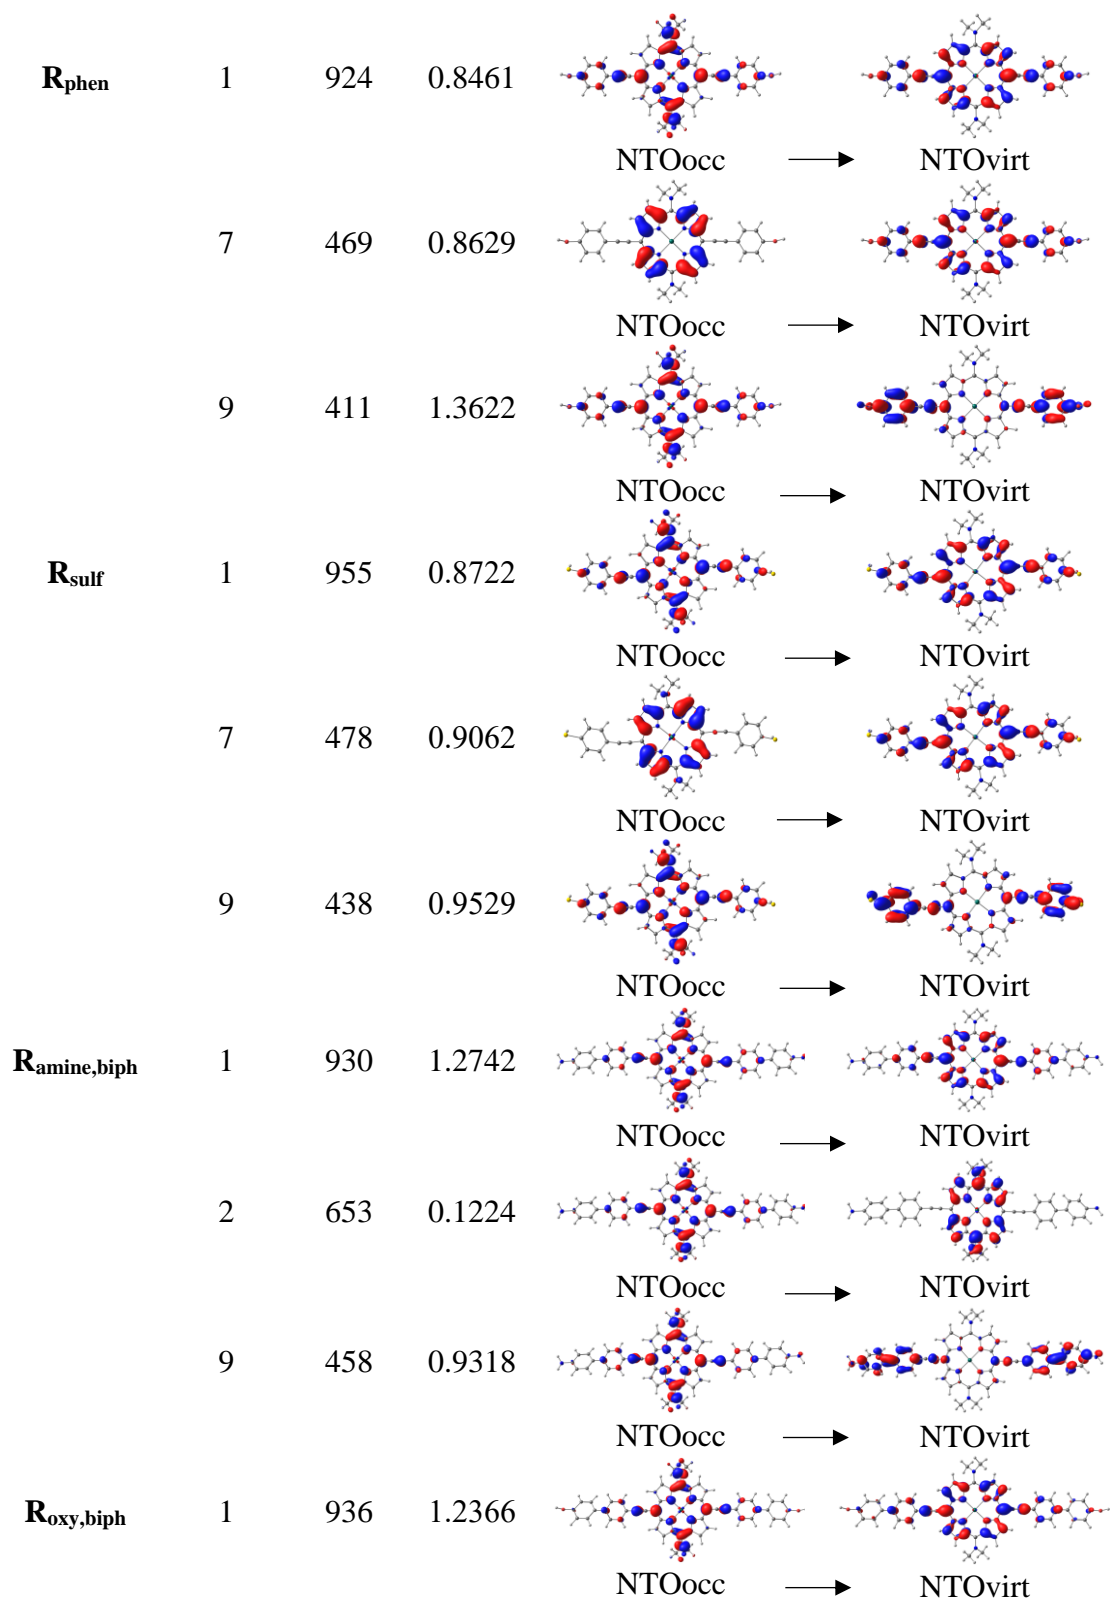



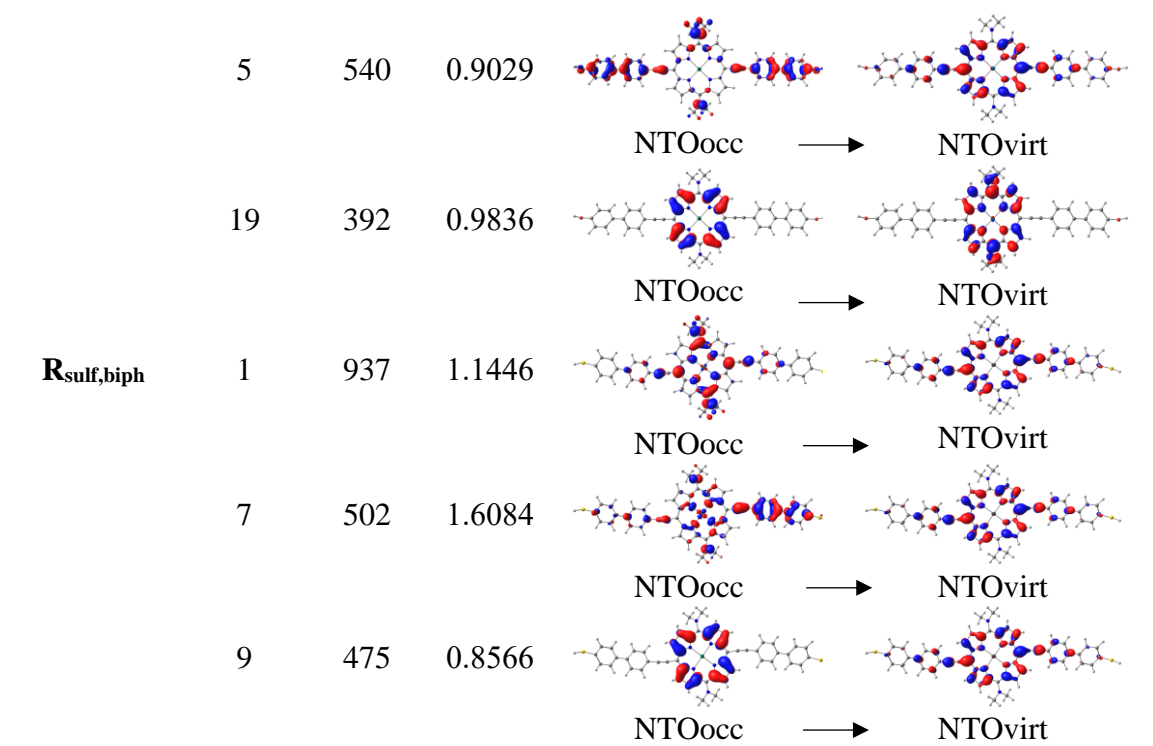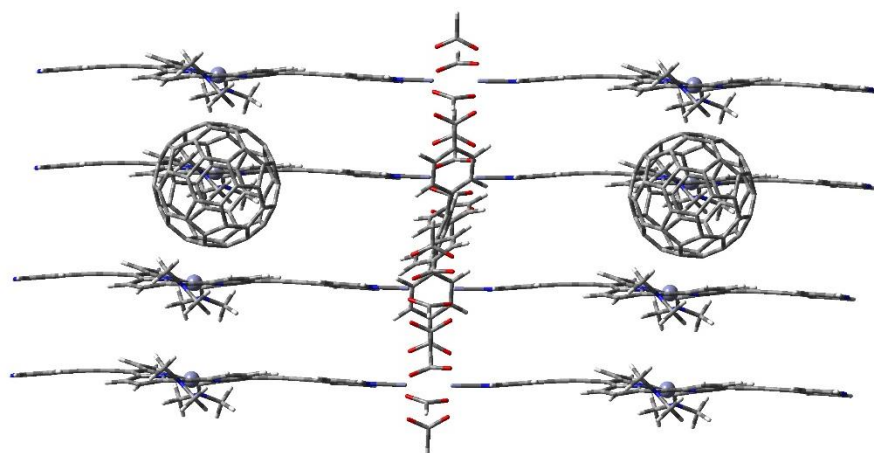

**Figure S7.** Molecular structure of  $C_{60}@R_{py-new}$ . Color code: H (white), C (gray), N (blue), O (red), and Zn (purple).
